# Supplementary material for: Estimates of price and income elasticity in Greece. Greek debt crisis transforming cigarettes into a luxury good: an econometric approach
Source: PubMed Central journal article supplement — BMJ Open. 2015 Jan 5;5(1):e004748. doi: 10.1136/bmjopen-2013-004748 (PMC4289736; doi:10.1136/bmjopen-2013-004748), 2015-01-05

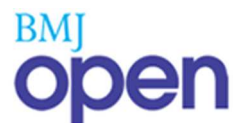

**Estimates of price and income elasticity in Greece: Greek debt crisis transforming cigarettes into a luxury good**

|                                 |                                                                                                                                                                                                                                                                                                                                                  |
|---------------------------------|--------------------------------------------------------------------------------------------------------------------------------------------------------------------------------------------------------------------------------------------------------------------------------------------------------------------------------------------------|
| Journal:                        | <i>BMJ Open</i>                                                                                                                                                                                                                                                                                                                                  |
| Manuscript ID:                  | bmjopen-2013-004748                                                                                                                                                                                                                                                                                                                              |
| Article Type:                   | Research                                                                                                                                                                                                                                                                                                                                         |
| Date Submitted by the Author:   | 23-Dec-2013                                                                                                                                                                                                                                                                                                                                      |
| Complete List of Authors:       | Tarantilis, Filippos; National School of Public Health, Department of Health Economics<br>Athanasakis, Kostas; National School of Public Health, Department of Health Economics<br>Vozikis, Athanasios; University of Piraeus, Department of Economics<br>Kyriopoulos, Ioannis; National School of Public Health, Department of Health Economics |
| <b>Primary Subject Heading</b>: | Health economics                                                                                                                                                                                                                                                                                                                                 |
| Secondary Subject Heading:      | Health economics, Health policy, Smoking and tobacco                                                                                                                                                                                                                                                                                             |
| Keywords:                       | HEALTH ECONOMICS, Health economics < HEALTH SERVICES ADMINISTRATION & MANAGEMENT, Health policy < HEALTH SERVICES ADMINISTRATION & MANAGEMENT                                                                                                                                                                                                    |
|                                 |                                                                                                                                                                                                                                                                                                                                                  |

SCHOLARONE™  
Manuscripts

1  
2  
3 **Estimates of price and income elasticity in Greece:**  
4

5 **Greek debt crisis transforming cigarettes into a luxury good**  
6

7  
8 Tarantilis F<sup>1</sup>, Athanasakis K<sup>1</sup>, Vozikis A<sup>2</sup>, Kyriopoulos J<sup>1</sup>  
9

10  
11 <sup>1</sup>National School of Public Health, Athens, Greece  
12

13  
14 <sup>2</sup>Department of Economics, University of Piraeus, Athens, Greece  
15

16  
17 Corresponding author: Filippos Tarantilis, Department of Health Economics, National School  
18 of Public Health, 196 Alexandras Av., Athens, 11521, Greece, [fil\\_t@hotmail.com](mailto:fil_t@hotmail.com), Phone No:  
19 00302132010242, Fax No: 00302106449571  
20  
21  
22

23  
24 Kostas Athanasakis, National School of Public Health, Department of Health Economics,  
25 Athens, Greece  
26  
27

28  
29 Athanassios Vozikis, University of Piraeus, Department of Economics, Athens, Greece  
30

31  
32 Ioannis Kyriopoulos, National School of Public Health, Department of Health Economics,  
33 Athens, Greece  
34  
35

36  
37 Keywords: smoking, taxation, price elasticity, income elasticity  
38

39  
40 Word count: 3,041  
41  
42  
43  
44  
45  
46  
47  
48  
49  
50  
51  
52  
53  
54  
55  
56  
57  
58  
59  
60

## **Abstract**

**Objective:** During the past decades, smoking prevalence in Greece was estimated near or over 40%. Following a sharp fall in newest data on cigarette consumption, our objective is to assess smokers' sensitivity to cigarette price and consumer income changes as well as to project health benefits of an additional tax increase.

**Methods:** Cigarette consumption was considered as the dependent variable, with Weighted Average Price as a proxy for cigarette price, GDP as a proxy for consumers' income and dummy variables reflecting smoking restrictions and antismoking campaigns. Values were computed to natural logarithms and regression was performed. Then, 4 scenarios of tax increase were distinguished in order to calculate potential health benefits.

**Results:** Addiction models were unable to provide statistically significant information due to a nearly 23.5% drop in consumption during 2012. Short-run price elasticity is estimated at -0.441 and short-run income elasticity is estimated at 1.040. Antismoking campaigns were found to have a statistically significant impact on consumption. Results indicate that, depending on the level of tax increase, annual per capita consumption could fall by at least 209.83 cigarettes; tax revenue could rise up by more than €0.74 billion, while smokers could be reduced by up to 530,568 and at least 465 smoking related deaths could be averted.

**Conclusions:** Price elasticity estimates are similar to previous studies in Greece, while income elasticity estimates are far greater. With cigarettes regarded as a luxury good, a great opportunity is presented for decision-makers to counter smoking. Increased taxation, along with focused antismoking campaigns, law reinforcement (to ensure compliance with smoking bans) and intensive control for smuggling could invoke a massive blow to the tobacco epidemic in Greece.

1  
2  
3 **Article Summary**  
4

- 5
- 6 • The article offers information to policy makers regarding price elasticity, a key  
7 measure to perform tobacco control policy  
8
  - 9 • The article reports, for the first time, an income elasticity above 1, as evidence that  
10 cigarettes tend to be considered a luxury good in Greece  
11
  - 12 • The analysis treats qualitative variables and projects health and financial benefits  
13 under extreme austerity  
14
  - 15 • The analysis could not include dynamic (addiction) models, as no statistical  
16 significance was reported  
17  
18  
19  
20  
21  
22  
23  
24  
25  
26  
27  
28  
29  
30  
31  
32  
33  
34  
35  
36  
37  
38  
39  
40  
41  
42  
43  
44  
45  
46  
47  
48  
49  
50  
51  
52  
53  
54  
55  
56  
57  
58  
59  
60

## Introduction

### Country Profile

Globally, more than 5 million people die every year from tobacco use, while tobacco use is the second leading cause of death, representing the 8.7% of global annual mortality .[1] As global tobacco consumption in 2009 was estimated at 5884 billion cigarettes,[2] tobacco clearly reflects the global transition from traditional risks such as undernutrition, unsafe sex, unsafe water, poor sanitation and hygiene to modern risks like physical inactivity, behavior risks and air quality.[1] In Greece, WHO estimations attribute 17% of mortality for people aged 30 or more to smoking.[3] Death rate attributed to tobacco and the proportion of deaths attributable to tobacco for ages 30 and over is documented in the following table (Table 1).

Table 1: Estimated death rated (per 100.000) and proportion attributable to tobacco for ages 30 and over, 2004 in Greece[3]

| Cause of death               | Death rate attributed to tobacco | Proportion of deaths attributable to tobacco |
|------------------------------|----------------------------------|----------------------------------------------|
| Lower respiratory infections | 3                                | 23%                                          |
| Malignant neoplasms          | 110                              | 29%                                          |
| Cardiovascular diseases      | 90                               | 12%                                          |
| Respiratory diseases         | 23                               | 37%                                          |

Little less than half Greek citizens (41%) are smokers.[4] Youth smoking is also high, 11.3% for young men and 9% for young women.[2] Environmental Tobacco Smoke (ETS) also represents a serious problem in Greece, as documented by previous research.[5]

Concerning cigarette affordability, findings suggest that Greece is one of the few high-income European Union countries with relatively low cigarette prices.[6] Low prices can be recognized as a factor for the tobacco epidemic in Greece.[7] According to own calculations,

1  
2  
3 for the period 1992-2012, cigarette affordability, defined as the percentage of income  
4  
5 needed to purchase 100 packs of cigarettes, was estimated from 0.56% to 1.98%.  
6  
7

8 The first organized efforts to counter smoking in Greece were observed during 1979-1982.  
9  
10 At the moment, in Greece, tobacco advertising bans are complete, except for point-of-sale  
11  
12 advertising.  
13

14  
15 Tax revenue from tobacco products is arguably very important for the economic policy. In  
16  
17 1990, tax revenue accounted for 4.4% of GDP.[8] For the period 1998-2010 tobacco tax  
18  
19 revenue stood for an annual average 2% of GDP, but it seems to follow a downwards trend.  
20  
21

22  
23 Official estimates measure the total annual direct cost of smoking a €2.14 billion, in an  
24  
25 environment where debt crisis and austerity measures set serious constraints to the health  
26  
27 system and resources should, now more than ever, be allocated properly. [9] Tobacco's  
28  
29 unfavorable consequences on the poor could become a factor, where unemployment rates  
30  
31 are estimated at 27.1% for the 2<sup>nd</sup> quarter of 2013, continuing to grow from under 900,000  
32  
33 to approximately 1,350,000 people in the last 24 months.[10] Moreover, 31% of the total  
34  
35 population is at risk of poverty or social exclusion.[11]  
36  
37

### 38 Tobacco Market and government interventions

39  
40  
41 Three market failures differentiate an individual's choice to smoke compared to the decision  
42  
43 to consume other goods: information failure on the health hazard of smoking, information  
44  
45 failure on the addiction caused by smoking and external burden to non-smokers.[12]  
46  
47

48 Therefore, government intervention is justified in order both to protect smokers from the  
49  
50 perilous habit and correct for externalities associated to smoking. From a basic economics'  
51  
52 standpoint, it can be claimed that smoking's immense social cost overtakes the excess  
53  
54 burden of taxation or else the loss of economic efficiency. The deadweight loss after the  
55  
56 introduction of tax is illustrated figures (Figure 1 and Figure 2).  
57  
58  
59  
60

1  
2  
3 Tobacco taxation is imposed through a variety of structures but, in nearly all cases, includes  
4  
5 two main types of tax: Ad valorem tax, which represents a percentage of price and specific  
6  
7 tax, which is a fixed tax per cigarette. In Greece, following the 2010 restructure of tobacco  
8  
9 tax, total tax represents 86% of the retail price, significantly increased compared to the 2009  
10  
11 level and 2008 level when is represented 83% and 70% of the retail price respectively (WHO,  
12  
13 2011). In 2012, specific excise tax was regulated at 80€ per 1,000 cigarettes and ad valorem  
14  
15 tax at 20% of the retail price. Their minimum sum is required to be no less than 115€ per  
16  
17 1,000 cigarettes. Meanwhile, a specific excise tax was set at 153€ per kg of hand-rolled  
18  
19 tobacco. Sales tax for cigarettes is fixed at 23% of the retail price.  
20  
21

22  
23 Price increases should not be regarded the only way to reduce consumption, as the impact  
24  
25 of income, advertising and health education are also important.[13] Manipulating these  
26  
27 variables will result to reduced consumption and eventually reduced mortality and  
28  
29 morbidity. Tobacco control programs and policies are found to be either cost-saving or cost-  
30  
31 effective, compared to other public health interventions such as cardiovascular risk  
32  
33 counseling and cancer screening.[14] Research on the impact of tobacco control showed  
34  
35 that during 1981-2000, increases in tobacco control program expenditures in the U.S.A. lead  
36  
37 to reduced cigarettes sales. Authors also suggest that expenditures have an even stronger  
38  
39 lagged influence on sales.[15] Smoking bans are adopted in order to limit exposure to smoke  
40  
41 but also cause a remarkable decrease in cigarette consumption, as smokers' opportunities to  
42  
43 smoke are lessened.[16] In Greece, the effort to restrict smoking in public places through  
44  
45 legislation has failed due to low compliance with law.[17] Youth exposed to secondhand  
46  
47 smoke at home are estimated at 89.8% of total youth population.[2] Public education  
48  
49 campaigns, if "hard-hitting, sophisticated and sustained", can be extremely effective.[18]  
50  
51  
52  
53  
54  
55  
56  
57  
58  
59  
60

### Price and income elasticities

The term used to measure the impact of a change in price on consumption is price elasticity of demand, defined as the percentage change in consumption that results from 1 percent increase in price.[19] Similarly, the impact of a change in income on consumption is measured by income elasticity, defined as the percentage change in consumption resulting from 1 percent increase in income. Estimating elasticity is crucial to policy makers in order not only to anticipate an intervention's impact both on tobacco consumption and tobacco tax revenue. If the proportionate fall in tobacco consumption exceeds the proportionate increase of tax, revenue will fall. Otherwise, revenue will rise.[16]

Results from a meta-analysis,[20] indicate that short run elasticity (-0.40) is lower than long run elasticity (-0.44), while in studies that included smuggling demand was less sensitive (-0.36). These findings confirm the general notion that a 10% increase in price would lead to a 4% reduction in consumption in high-income countries.[18] Stavrinou estimated the short run price elasticity at -0.079 and the long run at -0.147, while income elasticity is estimated at 0.18 and 0.33, respectively.[21] Hondroyannis and Papapetrou, based on data over the period 1967-1990, calculated the short run price elasticity at -0.33 and the long run at -0.6, while income elasticity estimations are 0.35 and 0.54, respectively. The fact that demand is inelastic is explained by the authors through addiction and the absence of direct substitutes. Furthermore, it is claimed that health warnings are more effective in reducing consumption than price increases.[9] Raptou and colleagues conclude in an income elasticity of 0.28, consisting of initiation elasticity (0.21) and consumption elasticity (0.07), arguing that income is a more important determinant for initiation rather than consumption. Furthermore, smoking bans are illustrated as a factor discouraging tobacco consumption.[22] Nikolaou and Velentzas, based on data from 1960 to 1995, estimated the short run price elasticity at -0.24 and the long run at -0.48, while income elasticity is



1  
2  
3 estimated at 0.19 and 0.40, respectively. Advertising had a positive but insignificant effect  
4 on demand and antismoking campaigns had a negative but insignificant effect on  
5 demand.[23] On the other hand, health warnings on packs during 1987-1990 had a  
6 significant negative impact on demand, lowering consumption by 4.2%. Dritsakis notes that  
7 consumption is a negative function of price and health education expenditure and a positive  
8 function of income as well.[24]  
9

10  
11  
12  
13  
14  
15  
16  
17 As illustrated, there are no studies of price elasticity available for at least a decade. In the  
18 light of the above, the purpose of the present study was to investigate cigarette demand in  
19 Greece.  
20  
21  
22

### 23 **Method**

24  
25  
26  
27 The tobacco product used in analysis is cigarettes, widely accepted as the major tobacco  
28 product. In order to account for population growth, annual consumption per person over 15  
29 was preferred to aggregate annual consumption. The threshold age was set at 15, as youth  
30 smoking in Greece is considered substantial. Data on cigarette consumption are available  
31 from 1994 onwards.  
32  
33  
34  
35  
36

37  
38  
39 Monthly (and quarterly) data on the quantities of taxed cigarettes were available from 2007  
40 to 2011. As excise tax data were not available and MPPC (Most Popular Price Category)  
41 shows inconsistency due to pricing policy, the measure chosen to reflect price was the  
42 Weighted Average Price. Each pack consists of 20 cigarettes. The proxy used to deflate  
43 nominal into real prices was calculated by comparing real and nominal values of GDP (Gross  
44 Domestic Product) derived from World Bank. CPI (Consumer Price Index) was not selected as  
45 a proxy due to a change in calculations by Hellenic Statistical Authority in 1995, when  
46 General Harmonized Consumer Price Index was introduced. The base year set was 2005.  
47  
48  
49  
50  
51  
52  
53  
54  
55  
56  
57  
58  
59  
60  
61  
62  
63  
64  
65  
66  
67  
68  
69  
70  
71  
72  
73  
74  
75  
76  
77  
78  
79  
80  
81  
82  
83  
84  
85  
86  
87  
88  
89  
90  
91  
92  
93  
94  
95  
96  
97  
98  
99  
100  
101  
102  
103  
104  
105  
106  
107  
108  
109  
110  
111  
112  
113  
114  
115  
116  
117  
118  
119  
120  
121  
122  
123  
124  
125  
126  
127  
128  
129  
130  
131  
132  
133  
134  
135  
136  
137  
138  
139  
140  
141  
142  
143  
144  
145  
146  
147  
148  
149  
150  
151  
152  
153  
154  
155  
156  
157  
158  
159  
160  
161  
162  
163  
164  
165  
166  
167  
168  
169  
170  
171  
172  
173  
174  
175  
176  
177  
178  
179  
180  
181  
182  
183  
184  
185  
186  
187  
188  
189  
190  
191  
192  
193  
194  
195  
196  
197  
198  
199  
200  
201  
202  
203  
204  
205  
206  
207  
208  
209  
210  
211  
212  
213  
214  
215  
216  
217  
218  
219  
220  
221  
222  
223  
224  
225  
226  
227  
228  
229  
230  
231  
232  
233  
234  
235  
236  
237  
238  
239  
240  
241  
242  
243  
244  
245  
246  
247  
248  
249  
250  
251  
252  
253  
254  
255  
256  
257  
258  
259  
260  
261  
262  
263  
264  
265  
266  
267  
268  
269  
270  
271  
272  
273  
274  
275  
276  
277  
278  
279  
280  
281  
282  
283  
284  
285  
286  
287  
288  
289  
290  
291  
292  
293  
294  
295  
296  
297  
298  
299  
300  
301  
302  
303  
304  
305  
306  
307  
308  
309  
310  
311  
312  
313  
314  
315  
316  
317  
318  
319  
320  
321  
322  
323  
324  
325  
326  
327  
328  
329  
330  
331  
332  
333  
334  
335  
336  
337  
338  
339  
340  
341  
342  
343  
344  
345  
346  
347  
348  
349  
350  
351  
352  
353  
354  
355  
356  
357  
358  
359  
360  
361  
362  
363  
364  
365  
366  
367  
368  
369  
370  
371  
372  
373  
374  
375  
376  
377  
378  
379  
380  
381  
382  
383  
384  
385  
386  
387  
388  
389  
390  
391  
392  
393  
394  
395  
396  
397  
398  
399  
400  
401  
402  
403  
404  
405  
406  
407  
408  
409  
410  
411  
412  
413  
414  
415  
416  
417  
418  
419  
420  
421  
422  
423  
424  
425  
426  
427  
428  
429  
430  
431  
432  
433  
434  
435  
436  
437  
438  
439  
440  
441  
442  
443  
444  
445  
446  
447  
448  
449  
450  
451  
452  
453  
454  
455  
456  
457  
458  
459  
460  
461  
462  
463  
464  
465  
466  
467  
468  
469  
470  
471  
472  
473  
474  
475  
476  
477  
478  
479  
480  
481  
482  
483  
484  
485  
486  
487  
488  
489  
490  
491  
492  
493  
494  
495  
496  
497  
498  
499  
500  
501  
502  
503  
504  
505  
506  
507  
508  
509  
510  
511  
512  
513  
514  
515  
516  
517  
518  
519  
520  
521  
522  
523  
524  
525  
526  
527  
528  
529  
530  
531  
532  
533  
534  
535  
536  
537  
538  
539  
540  
541  
542  
543  
544  
545  
546  
547  
548  
549  
550  
551  
552  
553  
554  
555  
556  
557  
558  
559  
560  
561  
562  
563  
564  
565  
566  
567  
568  
569  
570  
571  
572  
573  
574  
575  
576  
577  
578  
579  
580  
581  
582  
583  
584  
585  
586  
587  
588  
589  
590  
591  
592  
593  
594  
595  
596  
597  
598  
599  
600  
601  
602  
603  
604  
605  
606  
607  
608  
609  
610  
611  
612  
613  
614  
615  
616  
617  
618  
619  
620  
621  
622  
623  
624  
625  
626  
627  
628  
629  
630  
631  
632  
633  
634  
635  
636  
637  
638  
639  
640  
641  
642  
643  
644  
645  
646  
647  
648  
649  
650  
651  
652  
653  
654  
655  
656  
657  
658  
659  
660  
661  
662  
663  
664  
665  
666  
667  
668  
669  
670  
671  
672  
673  
674  
675  
676  
677  
678  
679  
680  
681  
682  
683  
684  
685  
686  
687  
688  
689  
690  
691  
692  
693  
694  
695  
696  
697  
698  
699  
700  
701  
702  
703  
704  
705  
706  
707  
708  
709  
710  
711  
712  
713  
714  
715  
716  
717  
718  
719  
720  
721  
722  
723  
724  
725  
726  
727  
728  
729  
730  
731  
732  
733  
734  
735  
736  
737  
738  
739  
740  
741  
742  
743  
744  
745  
746  
747  
748  
749  
750  
751  
752  
753  
754  
755  
756  
757  
758  
759  
760  
761  
762  
763  
764  
765  
766  
767  
768  
769  
770  
771  
772  
773  
774  
775  
776  
777  
778  
779  
780  
781  
782  
783  
784  
785  
786  
787  
788  
789  
790  
791  
792  
793  
794  
795  
796  
797  
798  
799  
800  
801  
802  
803  
804  
805  
806  
807  
808  
809  
810  
811  
812  
813  
814  
815  
816  
817  
818  
819  
820  
821  
822  
823  
824  
825  
826  
827  
828  
829  
830  
831  
832  
833  
834  
835  
836  
837  
838  
839  
840  
841  
842  
843  
844  
845  
846  
847  
848  
849  
850  
851  
852  
853  
854  
855  
856  
857  
858  
859  
860  
861  
862  
863  
864  
865  
866  
867  
868  
869  
870  
871  
872  
873  
874  
875  
876  
877  
878  
879  
880  
881  
882  
883  
884  
885  
886  
887  
888  
889  
890  
891  
892  
893  
894  
895  
896  
897  
898  
899  
900  
901  
902  
903  
904  
905  
906  
907  
908  
909  
910  
911  
912  
913  
914  
915  
916  
917  
918  
919  
920  
921  
922  
923  
924  
925  
926  
927  
928  
929  
930  
931  
932  
933  
934  
935  
936  
937  
938  
939  
940  
941  
942  
943  
944  
945  
946  
947  
948  
949  
950  
951  
952  
953  
954  
955  
956  
957  
958  
959  
960  
961  
962  
963  
964  
965  
966  
967  
968  
969  
970  
971  
972  
973  
974  
975  
976  
977  
978  
979  
980  
981  
982  
983  
984  
985  
986  
987  
988  
989  
990  
991  
992  
993  
994  
995  
996  
997  
998  
999  
1000

1  
2  
3 Deflation was not needed in that case, as real values were available. The base year set was  
4  
5 2005. Prior to 2008, national informative campaigns were not run in Greece at a national  
6  
7 level. We considered The National Action Plan for Cancer (2008) as an anti-smoking  
8  
9 campaign. A dummy variable was used to measure its influence on consumption.  
10  
11 Expenditure on tobacco control was not available. Regulation for smoking bans and  
12  
13 restrictions was only introduced in 2002 and amended in 2010. In order to measure its  
14  
15 influence on consumption, an adjusted version of a previous reliable index was constructed,  
16  
17 accounting not only for intensity of smoking restrictions but for compliance as well.[25]  
18  
19 Values attributed were between 0 (no restrictions) to 1 (total ban) escalating by 0.25.  
20  
21

22  
23 Regression analysis includes only a static model, as dynamic models (incorporating models)  
24  
25 show limited statistical significance, due to the inclusion of 2012 data in the time series.  
26  
27

28  
29 The functional form used in the analysis was Double-log. Testing for endogeneity of cigarette  
30  
31 prices was not possible as the annual tax rates were only available from 2008 onwards. Time  
32  
33 trend was found to be insignificant; therefore, it is excluded from the equations. The model  
34  
35 of demand was specified as follows.  
36  
37

38 *Conventional Demand Model*

39  
40  
41 
$$\ln Q_t = b_0 + b_1 \ln P_t + b_2 \ln Y_t + b_3 SR_t + b_4 AsC_t + \epsilon_t$$

42  
43  
44 Where,

45  
46  
47  $Q_t$ : consumption of cigarettes per person over 15 (000 cigarettes) in year t

48  
49  
50  $P_t$ : real retail price per pack of 20 cigarettes in year t

51  
52  
53  $Y_t$ : real per person over 15 disposable income (000 €) in year t

54  
55  
56  $b_0$ : intercept in year t  
57  
58  
59  
60

1  
2  
3  $SR_t$  : index of smoking restrictions in year t  
4

5  
6  $AsC_t$ : dummy checking the existence of an anti-smoking campaign each year t  
7

8  
9  $\varepsilon_t$  : the error term  
10  
11  
12  
13  
14  
15  
16  
17  
18  
19  
20  
21  
22  
23  
24  
25  
26  
27  
28  
29  
30  
31  
32  
33  
34  
35  
36  
37  
38  
39  
40  
41  
42  
43  
44  
45  
46  
47  
48  
49  
50  
51  
52  
53  
54  
55  
56  
57  
58  
59  
60

For peer review only

## Results

Through the conventional model of demand, the demand equation was estimated as follows:

$$\ln Q_t = -1.757 - 0.441 \ln P_t + 1.040 \ln Y_t - 0.132 \text{AsC}_t$$

F-statistic: 27.765

R square: 0.847

Durbin-Watson: 1.980

Calculations were made stepwise. The variable created to capture the effect of smoking restrictions was found insignificant; thus, it is excluded from the model. P value at 5% confidence level is asymptotically equal to 0 for  $\ln Y_t$ , equal to 0.001 for  $\ln P_t$  and equal to 0.021 for  $\text{AsC}_t$ . The F-statistic is high, showing a good level of fit, while the model explains a great part of the variation. The Durbin-Watson statistic is close to 2, suggesting that the model has no autocorrelation. The Variation Inflated Factor is low for all variables, implying that multicollinearity is a non-factor. Therefore, we accept a short-run price elasticity of demand at 0.441 and a short-run income elasticity of demand at 1.040.

Based on 2010 data, tax revenue per pack is calculated at 2.78€, a value verifying and corresponding to the fixed amount of tax (86% of the nominal retail price). We assume that the state maintains the existing ability to collect tribute. Government proclamations suggest that tobacco will be further taxed. Therefore, we distinct four scenarios, all with retail price increases as anticipated, each suggesting an additional price increase by 0.5€. Calculations are made only for the following year and accordingly only short run elasticity is taken into account. Scenarios capture the impact of the continuing fall in income at a rate of 4.8%. Based on Ross et al methodology and data concerning tobacco-related mortality in Greece

(Lower respiratory infections, Malignant neoplasms, Cardiovascular diseases and Respiratory diseases), we estimate reduction on smokers and mortality averted.[3,26]

Table 2: Impact of price increase and income constraints on consumption, tax revenue, number of smokers and smoking related deaths

| Model scenarios                            | Scenario 1 | Scenario 2 | Scenario 3 | Scenario 4 |       |
|--------------------------------------------|------------|------------|------------|------------|-------|
| Price per pack                             | 4.47 €     | 4.97 €     | 5.47 €     | 5.97 €     |       |
| Percent increase of price                  | 12.59%     | 25.19%     | 37.78%     | 50.38%     |       |
| Fall in consumption due to price increase  | -5.55%     | -11.11%    | -16.66%    | -22.22%    |       |
| Fall in consumption due to income decrease | -4.99%     | -4.99%     | -4.99%     | -4.99%     |       |
| Per capita consumption level               | 1,779.84   | 1,669.33   | 1,558.82   | 1,448.31   |       |
| Per capita consumption deterred            | 209.83     | 320.34     | 430.85     | 541.36     |       |
| Tax revenue per pack                       | 3.84 €     | 4.27 €     | 4.70 €     | 5.13 €     |       |
| Tax revenue per cigarette                  | 0.192 €    | 0.214 €    | 0.235 €    | 0.257 €    |       |
| Total tax revenue (€ billion)              | 3,336 €    | 3,478 €    | 3,575 €    | 3,625 €    |       |
| Incremental tax revenue (€ billion)        | 0,455 €    | 0,597 €    | 0,694 €    | 0,744 €    |       |
| Reduction in number of smokers             | 205,650    | 313,956    | 422,262    | 530,568    |       |
| Smoking related deaths averted             | high(0,50) | 930        | 1,420      | 1,911      | 2,401 |
|                                            | low(0,25)  | 465        | 710        | 955        | 1,200 |

-Differences in calculations may occur due to rounding

-Impact of price increase shared between prevalence and consumption

-High estimate indicates that 50% of smokers' deaths are attributable to tobacco use, whereas low estimate indicates that 25% of smokers' deaths are attributable to tobacco use

1  
2  
3 In all four scenarios, consumption is decreased substantially while tax revenue is still  
4  
5 increased thanks to the inelastic demand. Moreover, smokers are significantly reduced and  
6  
7 smoking related deaths are accordingly limited.  
8  
9

### 10 Discussion

11  
12 Price elasticity estimates are greater than previous research in Greece,[8, 23-24] but  
13  
14 consistent with findings by Gallet and List.[20] Estimates for income elasticity are far greater  
15  
16 than estimates provided by literature in Greece.[8, 21-23] Regarding antismoking campaigns,  
17  
18 results are in agreement with previous testimony.[23-24] Smoking restrictions show no  
19  
20 statistical significance, confirming the claims by Joosens and Raw that compliance is low.[17]  
21  
22 Finally, results are in general agreement with Alpert et al,[27] though a different  
23  
24 methodology is followed.  
25  
26  
27

28  
29 Paired with the still high cigarette affordability, as documented in the current study and  
30  
31 reported by previous research,[6] the nature of demand in Greece presents a vast  
32  
33 opportunity for the policy makers to counter the tobacco epidemic and ensure revenue and  
34  
35 cash flows at the same time. Even supposing that other determinants of demand, such as  
36  
37 income, which is anticipated to fall, do not change, tobacco taxation proves to be a powerful  
38  
39 tool. Annual consumption per person over 15 would be no higher than 1,780 cigarettes,  
40  
41 even in the worst case (scenario1) and may fall to less than 1,448 cigarettes. On the other  
42  
43 hand, tax revenue would recover from the downwards trend, accounting again for more  
44  
45 than 1.80% of GDP, even in scenario1. In absolute values, excess tobacco tax revenue could  
46  
47 rejuvenate the dismantled public coffers. Results suggest that even with a modest 10% of  
48  
49 tax revenue allocated to offsetting the tobacco epidemic, there would be more than enough  
50  
51 disposable funds towards planning, implementing, evaluating and improving antismoking  
52  
53 efforts. Greeks seem to be in agreement with heavy taxation on cigarettes, but only if  
54  
55 respective revenue is attributed to tobacco control.[28] In terms of public health benefits,  
56  
57  
58  
59  
60

1  
2  
3 smokers could be reduced by nearly 530,568 people, while up to 2,401 smoking related  
4  
5 deaths could be averted on an annual basis. Nonetheless, findings should be treated with  
6  
7 caution and increases in price should not be excessively increased from day one, as the  
8  
9 smokers' reaction is not easy to predict with confidence intervals widened. A stepwise  
10  
11 increase of tax would eliminate many of the risks associated with a sharp and sudden  
12  
13 increase in cigarette prices. Besides, Greece already performs better in tax collection than  
14  
15 countries such as Germany, France and Slovenia among others,[26] as the excise per smoker  
16  
17 ratio indicates, with 738.71€ collected for every smoker.  
18  
19

20  
21 Income sensitivity is larger than in any previous study either in Greece or internationally.  
22  
23 Thus, it is not exaggerating to argue that Greek smokers are shocked by the constraint on  
24  
25 their income. Besides, it is the first time in at least 40 years that income in Greece is falling at  
26  
27 this rate. The austerity measures should be viewed as a shift event in cigarette consumption,  
28  
29 among others.  
30  
31

32  
33 Reducing the toll of tobacco in Greece is not an easy task. Decisions should include fostering  
34  
35 an antismoking-culture through well-planned national antismoking campaigns, raising the  
36  
37 cigarettes prices at an initial level no less than 4€ a pack and ensuring compliance with the  
38  
39 anti-smoking law, especially on the current occasion, when City Police (the main mechanism  
40  
41 of control on the matter) was recently abolished as an institution. Controlling illicit trade is  
42  
43 crucial to maximize the effect of interventions.  
44  
45

46  
47 Possible future analysis of an even wider time series could provide even more reliable  
48  
49 results, as multicollinearity could be fully cured. Moreover, the current study is based on the  
50  
51 most popular price category in order to estimate the impact of prices changes on cigarette  
52  
53 demand. It is possible that a weighted average for all the brands sold in Greece could  
54  
55 eliminate unilateralism on prices data. Still, the anticipated but not fully documented switch  
56  
57 of Greek smokers from manufactured cigarettes to hand-rolled tobacco should be taken into  
58  
59  
60

1  
2  
3 account in any future research. Yet, if the increase of contraband cigarettes in the Greek  
4 market could be quantified, results would be more punctual. In addition, tobacco shows  
5 synergistic effect with other substances, such as alcohol. Thus, it would be meaningful to  
6 investigate the combined effect of tobacco and alcohol from an economic aspect. Finally,  
7 researchers argue that the increased availability of nicotine substitutes will reduce demand  
8 for tobacco products and increase the price sensitivity as well.[19] Under that scope, if  
9 research included nicotine substitutes, accuracy would be improved.  
10  
11  
12  
13  
14  
15  
16  
17  
18

19 **Contributorship Statement:** FT and AV performed the calculations and analyses reported in  
20 the text. FT and KA reviewed the literature for relevant data and documentation. FT and KA  
21 drafted the manuscript which was edited and critically revised by KA and JK.  
22  
23  
24  
25

#### 26 **Acknowledgements**

27  
28  
29 We would like to express our gratitude to Professor Frank Chaloupka for his valuable and  
30 constructive suggestions towards planning and development of this research work. His  
31 willingness to provide us his limited time has been very much appreciated.  
32  
33  
34  
35

36 **Funding:** None.  
37  
38

39 **Competing interests:** None.  
40  
41

42 **Data Sharing:** Extra data is available by emailing FT.  
43  
44  
45  
46  
47  
48  
49  
50  
51  
52  
53  
54  
55  
56  
57  
58  
59  
60



## References

1. WHO. Global Health Risks: Mortality and burden of disease attributable to selected major risks. Geneva: World Health Organization 2009  
[http://www.who.int/healthinfo/global\\_burden\\_disease/GlobalHealthRisks\\_report\\_full.pdf](http://www.who.int/healthinfo/global_burden_disease/GlobalHealthRisks_report_full.pdf) (Accessed 14 Nov 2011).
2. Eriksen M, Mackay J, Ross H. The Tobacco Atlas. Fourth Ed. Atlanta, GA, American Cancer Society, New York: World Lung Foundation 2012.
3. WHO. WHO Global report: Mortality Attributable to Tobacco. Geneva: World Health Organization 2012  
[http://whqlibdoc.who.int/publications/2012/9789241564434\\_eng.pdf](http://whqlibdoc.who.int/publications/2012/9789241564434_eng.pdf) (Accessed 5 Oct 2012).
4. Filippidis FT, Vardavas CI, Loukopoulou A et al. Prevalence and determinants of tobacco use among adults in Greece: 4 year trends. Eur J Public Health 2013;23(5):772-776.
5. Vardavas CI, Kondilis B, Travers MJ et al. Environmental tobacco smoke in hospitality venues in Greece. BMC Public Health 2007;7(1):302.
6. Blecher EH, Van Walbeek CP. Cigarette affordability trends: an update and some methodological comments. Tobacco Control 2009;18(3):167-175.
7. Vardavas CI, Kafatos AG. Smoking policy and prevalence in Greece: an overview. The European Journal of Public Health 2007;17(2):211-213.
8. Hondroyannis G, Papapetrou E. Cigarette consumption in Greece: empirical evidence from cointegration analysis. Applied Economics Letters 1997;4:571-574
9. Ministry of Health and Social Solidarity. The Greek National Plan of Action against Cancer 2008-2012, Athens, 2008. [http://ygeiamap.gov.gr/wp-content/uploads/2013/05/karkinos\\_teliko.pdf](http://ygeiamap.gov.gr/wp-content/uploads/2013/05/karkinos_teliko.pdf) (Accessed 5 Oct 2011)
10. Hellenic Statistical Authority, Workforce research, Press release 19 September 2013,

1  
2  
3 <http://www.statistics.gr/portal/page/portal/ESYE/BUCKET/A0101/PressReleases/A0>  
4  
5 [101\\_SJO01\\_DT\\_QQ\\_02\\_2013\\_01\\_F\\_GR.pdf](http://www.statistics.gr/portal/page/portal/ESYE/BUCKET/A0101/PressReleases/A0101_SJO01_DT_QQ_02_2013_01_F_GR.pdf) (Accessed 7 November 2013)  
6

- 7  
8 11. Eurostat news release 26 February 2013, Eurostat press office  
9  
10 [http://europa.eu/rapid/press-release\\_STAT-13-28\\_en.htm](http://europa.eu/rapid/press-release_STAT-13-28_en.htm) (Accessed 27 February  
11  
12 2013)
- 13  
14 12. Wilkins N, Yurekli A, Hu TW. Economic analysis of tobacco demand. Economics of  
15  
16 Tobacco Toolkit. Washington: World Bank 2004  
17  
18 <http://siteresources.worldbank.org/INTPH/Resources/3Demand.pdf> (Accessed 24  
19  
20 Nov 2011)
- 21  
22 13. Godfrey C, Maynard A. Economic aspects of tobacco use and taxation policy. BMJ  
23  
24 1998;297(6644):339–343.
- 25  
26 14. Kahende JW, Loomis BR, Adhikari B, Marshall L. A review of economic evaluations of  
27  
28 tobacco control programs. Int J Environ Res Public Health 2009;6(1):51-68.
- 29  
30 15. Farrelly M, Bray J. Responses to cigarette tax increases by race/ethnicity, income  
31  
32 and age groups – United States, 1976–1993. Journal of the American Medical  
33  
34 Association 1999;280:1979-1980.
- 35  
36 16. Chaloupka F, Warner E. The economics of smoking. Handbook of Health Economics,  
37  
38 2000;1:1539-1627.
- 39  
40 17. Joossens L, Raw M. The tobacco control scale 2010 in Europe. Brussels: Association  
41  
42 of European Cancer Leagues 2011.
- 43  
44 18. WHO. Report on the Global Tobacco Epidemic, 2008: The MPOWER package.  
45  
46 Geneva: World Health Organization 2008  
47  
48 [http://www.who.int/tobacco/mpower/mpower\\_report\\_full\\_2008.pdf](http://www.who.int/tobacco/mpower/mpower_report_full_2008.pdf) (Accessed 14  
49  
50 Nov 2011).  
51  
52  
53  
54  
55  
56  
57  
58  
59  
60

- 1  
2  
3 19. Chaloupka F, Pacula R. The impact of price on youth tobacco use. Changing  
4 Adolescent Smoking Prevalence: Where It Is and Why, Smoking and Tobacco Control  
5 Monograph 1999:14.  
6  
7  
8  
9  
10 20. Gallet C, List J. Cigarette demand: A meta-analysis of elasticities. Health Econ  
11 2003;12:821-835.  
12  
13  
14 21. Stavrinou VG. The effects of an anti-smoking campaign on cigarette consumption:  
15 empirical evidence from Greece. Applied Economics 1987;19:323-329.  
16  
17  
18 22. Raptou E, Mattas K, Tsakiridou E et al. Factors affecting cigarette  
19 demand. International Advances in Economic Research 2005;11(3):275-290.  
20  
21  
22 23. Nikolaou A, Velentzas K. Estimating the Demand for Cigarettes in Greece: An Error  
23 Correction Model, Agricultural Economics Review 2001;2(1):20-27.  
24  
25  
26 24. Dritsakis E. Forecasting of cigarettes consumption in Greece: An empirical  
27 investigation with cointegration analysis. Agricultural Economic Review  
28 2003;4(2):47-56.  
29  
30  
31 25. Wasserman J, Manning WG, Newhouse JP et al. The Effects of Excise Taxes and  
32 Regulations on Cigarette Smoking. Journal of Health Economics 1991;10(1):43-64.  
33  
34  
35 26. Ross HZ, Shariff S, Gilmore A. Economics of Tobacco Taxation in Russia. Paris:  
36 International Union Against Tuberculosis and Lung Disease 2008.  
37  
38  
39 27. Alpert HR, Vardavas CI, Chaloupka FJ et al. The recent and projected public health  
40 and economic benefits of cigarette taxation in Greece. Tobacco Control 2013 Mar 6.  
41 [Epub ahead of print]  
42  
43  
44 28. Vardavas CI, Filippidis FT, Agaku I et al. Tobacco taxation: the importance of  
45 earmarking the revenue to health care and tobacco control. Tobacco induced  
46 diseases 2012;10(1):21.  
47  
48  
49  
50  
51  
52  
53  
54  
55  
56  
57  
58  
59  
60

1  
2  
3  
4  
5  
6  
7  
8  
9  
10  
11  
12  
13  
14  
15  
16  
17  
18  
19  
20  
21  
22  
23  
24  
25  
26  
27  
28  
29  
30  
31  
32  
33  
34  
35  
36  
37  
38  
39  
40  
41  
42  
43  
44  
45  
46  
47  
48  
49  
50  
51  
52  
53  
54  
55  
56  
57  
58  
59  
60

**Figures**

Figure 1: The demand curve before government intervention

Figure 2: The demand curve after government intervention

For peer review only

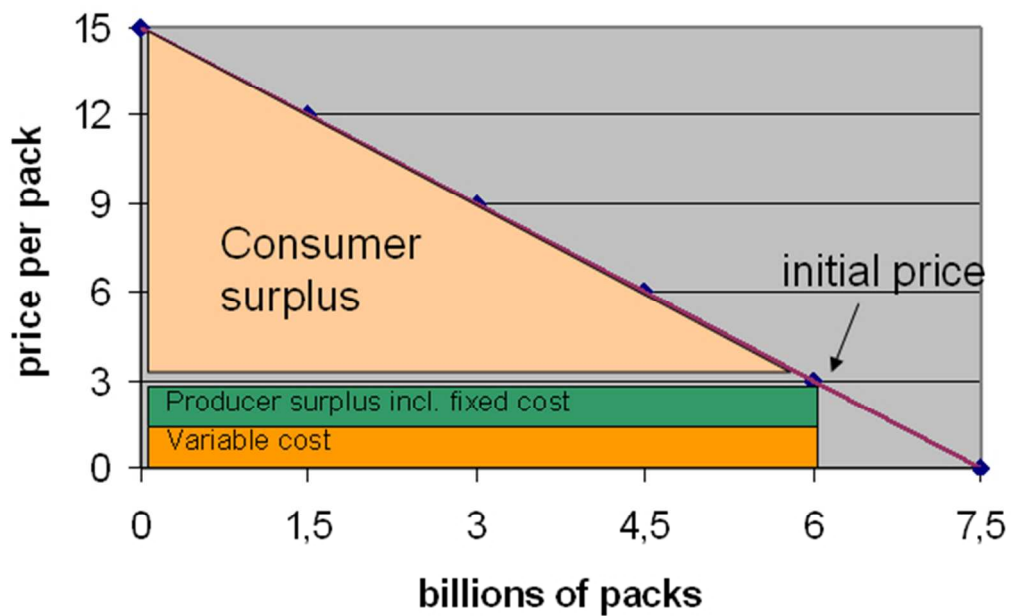

Figure 1: The demand curve before government intervention

review only

1  
2  
3  
4  
5  
6  
7  
8  
9  
10  
11  
12  
13  
14  
15  
16  
17  
18  
19  
20  
21  
22  
23  
24  
25  
26  
27  
28  
29  
30  
31  
32  
33  
34  
35  
36  
37  
38  
39  
40  
41  
42  
43  
44  
45  
46  
47  
48  
49  
50  
51  
52  
53  
54  
55  
56  
57  
58  
59  
60

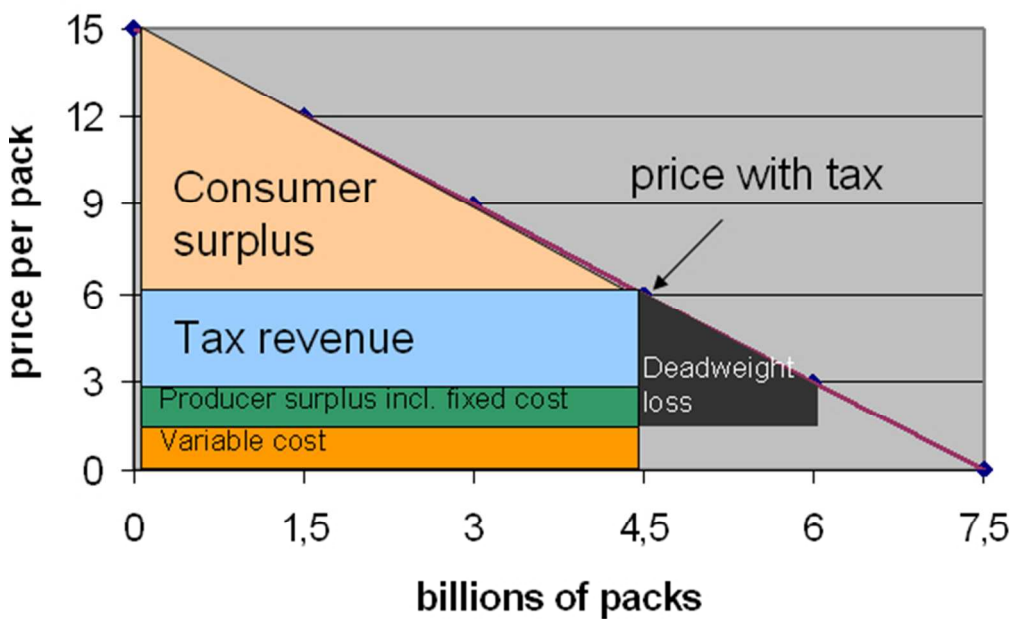

Figure 2: The demand curve after government intervention

review only

# BMJ Open

## Estimates of price and income elasticity in Greece: Greek debt crisis transforming cigarettes into a luxury good - an econometric approach

|                                 |                                                                                                                                                                                                                                                                                                                                                                                                                                        |
|---------------------------------|----------------------------------------------------------------------------------------------------------------------------------------------------------------------------------------------------------------------------------------------------------------------------------------------------------------------------------------------------------------------------------------------------------------------------------------|
| Journal:                        | <i>BMJ Open</i>                                                                                                                                                                                                                                                                                                                                                                                                                        |
| Manuscript ID:                  | bmjopen-2013-004748.R1                                                                                                                                                                                                                                                                                                                                                                                                                 |
| Article Type:                   | Research                                                                                                                                                                                                                                                                                                                                                                                                                               |
| Date Submitted by the Author:   | 11-Apr-2014                                                                                                                                                                                                                                                                                                                                                                                                                            |
| Complete List of Authors:       | Tarantilis, Filippos; National School of Public Health, Department of Health Economics<br>Athanasakis, Kostas; National School of Public Health, Department of Health Economics<br>Zavras, Dimitris; National School of Public Health, Department of Health Economics<br>Vozikis, Athanasios; University of Piraeus, Department of Economics<br>Kyriopoulos, Ioannis; National School of Public Health, Department of Health Economics |
| <b>Primary Subject Heading</b>: | Health economics                                                                                                                                                                                                                                                                                                                                                                                                                       |
| Secondary Subject Heading:      | Health economics, Health policy, Smoking and tobacco                                                                                                                                                                                                                                                                                                                                                                                   |
| Keywords:                       | HEALTH ECONOMICS, Health economics < HEALTH SERVICES ADMINISTRATION & MANAGEMENT, Health policy < HEALTH SERVICES ADMINISTRATION & MANAGEMENT                                                                                                                                                                                                                                                                                          |
|                                 |                                                                                                                                                                                                                                                                                                                                                                                                                                        |

SCHOLARONE™  
Manuscripts

1  
2  
3 **Estimates of price and income elasticity in Greece:**  
4

5 **Greek debt crisis transforming cigarettes into a luxury good - an econometric approach**  
6

7  
8 Tarantilis F<sup>1</sup>, Athanasakis K<sup>1</sup>, Zavras D<sup>1</sup>, Vozikis A<sup>2</sup>, Kyriopoulos I<sup>1</sup>  
9

10  
11 <sup>1</sup>National School of Public Health, Athens, Greece  
12

13  
14 <sup>2</sup>Department of Economics, University of Piraeus, Athens, Greece  
15

16  
17 Corresponding author: Filippos Tarantilis, Department of Health Economics, National School  
18 of Public Health, 196 Alexandras Av., Athens, 11521, Greece, [fil\\_t@hotmail.com](mailto:fil_t@hotmail.com), Phone No:  
19 00302132010242, Fax No: 00302106449571  
20  
21  
22

23  
24 Kostas Athanasakis, National School of Public Health, Department of Health Economics,  
25 Athens, Greece  
26  
27

28  
29 Dimitris Zavras, National School of Public Health, Department of Health Economics, Athens,  
30 Greece  
31  
32

33  
34 Athanassios Vozikis, University of Piraeus, Department of Economics, Athens, Greece  
35

36  
37 Ioannis Kyriopoulos, National School of Public Health, Department of Health Economics,  
38 Athens, Greece  
39  
40

41  
42 Keywords: smoking, taxation, price elasticity, income elasticity  
43  
44

45  
46 Word count: 2,909 (without abstract, article summary, headings, tables, contributorship  
47 statement, acknowledgements, funding, competing interests and data sharing)  
48  
49  
50  
51  
52  
53  
54  
55  
56  
57  
58  
59  
60



## **Abstract**

**Objective:** During the past decades, smoking prevalence in Greece was estimated near or over 40%. Following a sharp fall in newest data on cigarette consumption, our objective is to assess smokers' sensitivity to cigarette price and consumer income changes as well as to project health benefits of an additional tax increase.

**Methods:** Cigarette consumption was considered as the dependent variable, with Weighted Average Price as a proxy for cigarette price, GDP as a proxy for consumers' income and dummy variables reflecting smoking restrictions and antismoking campaigns. Values were computed to natural logarithms and regression was performed. Then, 4 scenarios of tax increase were distinguished in order to calculate potential health benefits.

**Results:** Short-run price elasticity is estimated at -0.441 and short-run income elasticity is estimated at 1.040. Antismoking campaigns were found to have a statistically significant impact on consumption. Results indicate that, depending on the level of tax increase, annual per capita consumption could fall by at least 209.83 cigarettes; tax revenue could rise up by more than €0.74 billion, while smokers could be reduced by up to 530,568 and at least 465 smoking related deaths could be averted.

**Conclusions:** Price elasticity estimates are similar to previous studies in Greece, while income elasticity estimates are far greater. With cigarettes regarded as a luxury good, a great opportunity is presented for decision-makers to counter smoking. Increased taxation, along with focused antismoking campaigns, law reinforcement (to ensure compliance with smoking bans) and intensive control for smuggling could invoke a massive blow to the tobacco epidemic in Greece.

**Strengths and limitations of this study**

- The article offers information to policy makers regarding price elasticity, a key measure to perform tobacco control policy
- The article reports, for the first time, an income elasticity above 1, as evidence that cigarettes tend to be considered a luxury good in Greece
- The analysis treats qualitative variables and projects health and financial benefits under extreme austerity
- The analysis could not include dynamic (addiction) models, as no statistical significance was reported

## Introduction

### Country Profile

Globally, more than 5 million people die every year from tobacco use, while tobacco use is the second leading cause of death, representing the 8.7% of global annual mortality .[1] As global tobacco consumption in 2009 was estimated at 5884 billion cigarettes,[2] tobacco clearly reflects the global transition from traditional risks such as undernutrition, unsafe sex, unsafe water, poor sanitation and hygiene to modern risks like physical inactivity, behavior risks and air quality.[1] In Greece, WHO estimations attribute 17% of mortality for people aged 30 or more to smoking.[3] Death rate attributed to tobacco and the proportion of deaths attributable to tobacco for ages 30 and over is documented in the following table (Table 1).

Table 1: Estimated death rated (per 100.000) and proportion attributable to tobacco for ages 30 and over, 2004 in Greece [3]

| Cause of death               | Death rate attributed to tobacco | Proportion of deaths attributable to tobacco |
|------------------------------|----------------------------------|----------------------------------------------|
| Lower respiratory infections | 3                                | 23%                                          |
| Malignant neoplasms          | 110                              | 29%                                          |
| Carciovascular diseases      | 90                               | 12%                                          |
| Respiratoty diseases         | 23                               | 37%                                          |

Little less than half Greek citizens (41%) are smokers.[4] Youth smoking is also high, 11.3% for young men and 9% for young women.[2] Environmental Tobacco Smoke (ETS) also represents a serious problem in Greece, as documented by previous research.[5]

Concerning cigarette affordability, findings suggest that Greece is one of the few high-income European Union countries with relatively low cigarette prices.[6] Low prices can be

1  
2  
3 recognized as a factor for the tobacco epidemic in Greece.[7] According to own calculations,  
4  
5 for the period 1992-2012, cigarette affordability, defined as the percentage of income  
6  
7 needed to purchase 100 packs of cigarettes, was estimated from 0.56% to 1.98%.  
8  
9

10 The first organized efforts to counter smoking in Greece were observed during 1979-1982.  
11  
12 At the moment, in Greece, tobacco advertising bans are complete, except for point-of-sale  
13  
14 advertising.  
15

16  
17 Tax revenue from tobacco products is arguably very important for the economic policy. In  
18  
19 1990, tax revenue accounted for 4.4% of GDP.[8] For the period 1998-2010 tobacco tax  
20  
21 revenue stood for an annual average 2% of GDP, but it seems to follow a downwards trend.  
22  
23

24 Official estimates measure the total annual direct cost of smoking a €2.14 billion, in an  
25  
26 environment where debt crisis and austerity measures set serious constraints to the health  
27  
28 system and resources should, now more than ever, be allocated properly. [9] Tobacco's  
29  
30 unfavorable consequences on the poor could become a factor, where unemployment rates  
31  
32 are estimated at 27.1% for the 2<sup>nd</sup> quarter of 2013, continuing to grow from under 900,000  
33  
34 to approximately 1,350,000 people in the last 24 months.[10] Moreover, 31% of the total  
35  
36 population is at risk of poverty or social exclusion.[11]  
37  
38  
39

#### 40 Tobacco Market and government interventions

41

42  
43 Three market failures differentiate an individual's choice to smoke compared to the decision  
44  
45 to consume other goods: information failure on the health hazard of smoking, information  
46  
47 failure on the addiction caused by smoking and external burden to non-smokers.[12]  
48  
49

50 Therefore, government intervention is justified in order both to protect smokers from the  
51  
52 perilous habit and correct for externalities associated to smoking. From a basic economics'  
53  
54 standpoint, it can be claimed that smoking's immense social burden overtakes the loss of  
55  
56 consumer's utility or else the loss of economic efficiency (deadweight loss).  
57  
58  
59  
60

1  
2  
3 Tobacco taxation is imposed through a variety of structures but, in nearly all cases, includes  
4 two main types of tax: Ad valorem tax, which represents a percentage of price and specific  
5 tax, which is a fixed tax per cigarette. In Greece, following the 2010 restructure of tobacco  
6 tax, total tax represents 86% of the retail price, significantly increased compared to the 2009  
7 level and 2008 level when is represented 83% and 70% of the retail price respectively (WHO,  
8 2011). In 2012, specific excise tax was regulated at €80 per 1,000 cigarettes and ad valorem  
9 tax at 20% of the retail price. Their minimum sum is required to be no less than €115 per  
10 1,000 cigarettes. Meanwhile, a specific excise tax was set at €153 per kg of hand-rolled  
11 tobacco. Sales tax for cigarettes is fixed at 23% of the retail price.  
12  
13

14 Price increases should not be regarded the only way to reduce consumption, as the impact  
15 of income, advertising and health education are also important.[13] Manipulating these  
16 variables will result to reduced consumption and eventually reduced mortality and  
17 morbidity. Tobacco control programs and policies are found to be either cost-saving or cost-  
18 effective, compared to other public health interventions such as cardiovascular risk  
19 counseling and cancer screening.[14] Research on the impact of tobacco control showed  
20 that during 1981-2000, increases in tobacco control program expenditures in the U.S.A. lead  
21 to reduced cigarettes sales. Authors also suggest that expenditures have an even stronger  
22 lagged influence on sales.[15] Smoking bans are adopted in order to limit exposure to smoke  
23 but also cause a remarkable decrease in cigarette consumption, as smokers' opportunities to  
24 smoke are lessened.[16] In Greece, the effort to restrict smoking in public places through  
25 legislation has failed due to low compliance with law.[17] Youth exposed to secondhand  
26 smoke at home are estimated at 89.8% of total youth population.[2] Public education  
27 campaigns, if "hard-hitting, sophisticated and sustained", can be extremely effective.[18]  
28  
29  
30  
31  
32  
33  
34  
35  
36  
37  
38  
39  
40  
41  
42  
43  
44  
45  
46  
47  
48  
49  
50  
51  
52  
53  
54  
55  
56  
57  
58  
59  
60

### Price and income elasticity

The term used to measure the impact of a change in price on consumption is price elasticity of demand, defined as the percentage change in consumption that results from 1 percent increase in price.[19] Similarly, the impact of a change in income on consumption is measured by income elasticity, defined as the percentage change in consumption resulting from 1 percent increase in income. Estimating elasticity is crucial to policy makers in order not only to anticipate an intervention's impact both on tobacco consumption and tobacco tax revenue. If the proportionate fall in tobacco consumption exceeds the proportionate increase of tax, revenue will fall. Otherwise, revenue will rise.[16]

Results from a meta-analysis,[20] indicate that short run elasticity (-0.40) is lower than long run elasticity (-0.44), while in studies that included smuggling demand was less sensitive (-0.36). These findings confirm the general notion that a 10% increase in price would lead to a 4% reduction in consumption in high-income countries.[18] Stavrinou estimated the short run price elasticity at -0.079 and the long run at -0.147, while income elasticity is estimated at 0.18 and 0.33, respectively.[21] Hondroyannis and Papapetrou, based on data over the period 1967-1990, calculated the short run price elasticity at -0.33 and the long run at -0.6, while income elasticity estimations are 0.35 and 0.54, respectively. The fact that demand is inelastic is explained by the authors through addiction and the absence of direct substitutes. Furthermore, it is claimed that health warnings are more effective in reducing consumption than price increases.[9] Raptou and colleagues conclude in an income elasticity of 0.28, consisting of initiation elasticity (0.21) and consumption elasticity (0.07), arguing that income is a more important determinant for initiation rather than consumption. Furthermore, smoking bans are illustrated as a factor discouraging tobacco consumption.[22] Nikolaou and Velentzas, based on data from 1960 to 1995, estimated the short run price elasticity at -0.24 and the long run at -0.48, while income elasticity is

1  
2  
3 estimated at 0.19 and 0.40, respectively. Advertising had a positive but non-significant effect  
4 on demand and antismoking campaigns had a negative but non-significant effect on  
5 demand.[23] On the other hand, health warnings on packs during 1987-1990 had a  
6 significant negative impact on demand, lowering consumption by 4.2%. Dritsakis notes that  
7 consumption is a negative function of price and health education expenditure and a positive  
8 function of income as well.[24]  
9

10  
11  
12  
13  
14  
15  
16  
17 As illustrated, there are no studies of price elasticity available for at least a decade. In the  
18 light of the above, the purpose of the present study was to investigate cigarette demand in  
19 Greece.  
20  
21  
22

### 23 **Method**

24  
25  
26  
27 The tobacco product used in analysis is cigarettes, widely accepted as the major tobacco  
28 product. In order to account for population growth, annual consumption per person over 15  
29 was preferred to aggregate annual consumption. The threshold age was set at 15, as youth  
30 smoking in Greece is considered substantial. Data on annual cigarette consumption are  
31 available from 1994 onwards (1994-2012) from the Greek Ministry of Finance.  
32  
33  
34  
35  
36  
37

38  
39 As excise tax data were not available and MPPC (Most Popular Price Category) shows  
40 inconsistency due to pricing policy, the measure chosen to reflect price was the Weighted  
41 Average Price. Each pack consists of 20 cigarettes. The proxy used to deflate nominal into  
42 real prices was calculated by comparing real and nominal values of GDP (Gross Domestic  
43 Product) derived from World Bank. CPI (Consumer Price Index) was not selected as a proxy  
44 due to a change in calculations by Hellenic Statistical Authority in 1995, when General  
45 Harmonized Consumer Price Index was introduced. The base year set was 2005. Disposable  
46 income data were based at GDP. Again, the threshold age was set at 15. Deflation was not  
47 needed in that case, as real values were available. The base year set was 2005. Prior to 2008,  
48  
49  
50  
51  
52  
53  
54  
55  
56  
57  
58  
59  
60

1  
2  
3 national informative campaigns were not run in Greece at a national level. We considered  
4  
5 The National Action Plan for Cancer (2008) as an anti-smoking campaign. A dummy variable  
6  
7 was used to measure its influence on consumption. Expenditure on tobacco control was not  
8  
9 available. Regulation for smoking bans and restrictions was only introduced in 2002 and  
10  
11 amended in 2010. In order to measure its influence on consumption, an adjusted version of  
12  
13 a previous reliable index was constructed, accounting not only for intensity of smoking  
14  
15 restrictions but for compliance as well.[25] Values attributed were between 0 (no  
16  
17 restrictions) to 1 (total ban) escalating by 0.25.  
18  
19

20  
21 Data were analyzed with the statistical software packages SPSS® 20 and STATA® 9. The  
22  
23 functional form used in the analysis was Double-log and values were transformed to natural  
24  
25 logarithms in order to increase reliability. The models of demand were specified as follows.  
26  
27

28 *Conventional Demand Model*

29  
30  
31 
$$\ln Q_t = b_0 + b_1 \ln P_t + b_2 \ln Y_t + b_3 SR_t + b_4 AsC_t + \varepsilon_t$$

32  
33  
34 *Myopic Addiction Model*

35  
36  
37 
$$\ln Q_t = b_0 + b_1 \ln P_t + b_2 \ln Y_t + b_3 SR_t + b_4 AsC_t + b_5 \ln Q_{t-1} + \varepsilon_t$$

38  
39  
40 *Rational Addiction Model*

41  
42 
$$\ln Q_t = b_0 + b_1 \ln P_t + b_2 \ln Y_t + b_3 SR_t + b_4 AsC_t + b_5 \ln Q_{t-1} + b_6 \ln Q_{t+1} + \varepsilon_t$$

43  
44 Where,

45  
46  
47  $Q_t$  : consumption of cigarettes per person over 15 (000 cigarettes) in year t

48  
49  
50  $Q_{t-1}$  : consumption of cigarettes per person over 15(000 cigarettes) in year t-1

51  
52  
53  $Q_{t+1}$  : consumption of cigarettes per person over 15(000 cigarettes) in year t+1

54  
55  
56  $P_t$  : real retail price per pack of 20 cigarettes in year t

57  
58  
59  $Y_t$ : real per person over 15 disposable income (€000) in year t  
60



$b_0$ : intercept in year t

$SR_t$ : index of smoking restrictions or bans according to law in year t

$AsC_t$ : dichotomous index reflecting the existence of an anti-smoking campaign each year t

$\varepsilon_t$ : the error term

## Results

Through the conventional model of demand, the demand equation was estimated as follows

(Table 2):

Table 2: Conventional model of demand equation

|                                                                                                                                |                 |                      |
|--------------------------------------------------------------------------------------------------------------------------------|-----------------|----------------------|
| $\ln Q_t = -1.757 - 0.441 \cdot \ln P_t + 1.040 \cdot \ln Y_t - 0.132 \cdot AsC_t$                                             |                 |                      |
| F-statistic: 27.765                                                                                                            | R square: 0.847 | Durbin-Watson: 1.980 |
| Skewness/Kurtosis tests for Normality: adj $\chi^2 = 5.10$ , Prob> $\chi^2 = 0.0780$                                           |                 |                      |
| Breusch-Pagan / Cook-Weisberg test for heteroskedasticity: $\chi^2 = 2.56$ , Prob> $\chi^2 = 0.1093$                           |                 |                      |
| Dickey-Fuller test for unit root: Z(t)= -2.364, 1% critical value=-2.660, 5% critical value= -1.950, 10% critical value=-1.600 |                 |                      |

A regression analysis was performed and calculations were made stepwise. The variable created to capture the effect of smoking restrictions was found non-significant (p value asymptotically equal to 0.303 at 5% confidence level); thus, it is excluded from the model. P value at 5% confidence level is asymptotically equal to 0 for  $\ln Y_t$ , equal to 0.001 for  $\ln P_t$  and equal to 0.021 for  $AsC_t$ . The F-statistic is high, showing a good level of fit, while the model explains a great part of the variation. The Durbin-Watson statistic is close to 2, suggesting that the model has no autocorrelation. The Variation Inflated Factor is low for all variables, implying that multicollinearity is a non-factor. As evidenced by normality tests, standardized

1  
2  
3 residuals follow a normal distribution. Breusch-Pagan / Cook-Weisberg tests indicate that  
4  
5 residuals are homoscedastic. The Augmented Dickey-Fuller test for standardized residuals  
6  
7 confirms that there exist no unit roots. Therefore, the standardized residuals are stationary,  
8  
9 so the variables of the model are cointegrated (without constant and trend) and the  
10  
11 regression is not spurious. In the light of the above, we accept a short-run price elasticity of  
12  
13 demand at 0.441 and a short-run income elasticity of demand at 1.040.  
14

15  
16 Through the myopic addiction model, the additional variable ( $\ln Q_{t-1}$ ) shows no statistical  
17  
18 significance. Therefore the model remains unchanged. Through the rational addiction  
19  
20 model, only the variable representing following year's consumption ( $\ln Q_{t+1}$ ) is found  
21  
22 significant (p value asymptotically equal to 0), with substantially lower levels of fit (R  
23  
24 square). Thus, we conclude that addiction models fail to offer additional information on how  
25  
26 consumption is influenced. Based on 2010 data, nominal tax revenue per pack is calculated  
27  
28 at €2.78, a value verifying and corresponding to the fixed amount of tax (86% of the nominal  
29  
30 retail price). We assume that the state maintains the existing ability to collect tribute.  
31  
32 Government proclamations suggest that tobacco will be further taxed. Therefore, we  
33  
34 distinct four scenarios, all with retail price increases, as anticipated, and each suggesting an  
35  
36 additional price increase by €0.5. Calculations are made only for the following year and  
37  
38 accordingly only short run elasticity is taken into account. Scenarios capture the impact of  
39  
40 the continuing fall in income at a rate of 4.8%. Based on Ross et al methodology and data  
41  
42 concerning tobacco-related mortality in Greece (Lower respiratory infections, Malignant  
43  
44 neoplasms, Cardiovascular diseases and Respiratory diseases), we estimate reduction on  
45  
46 smokers and mortality averted.[3,26]  
47  
48  
49  
50  
51  
52  
53  
54  
55  
56  
57  
58  
59  
60

Table 3: Impact of price increase and income constraints on consumption, tax revenue, number of smokers and smoking related deaths

| Model scenarios                            | Scenario 1 | Scenario 2 | Scenario 3 | Scenario 4 |       |
|--------------------------------------------|------------|------------|------------|------------|-------|
| Price per pack                             | €4.47      | €4.97      | €5.47      | €5.97      |       |
| Percent increase of price                  | 12.59%     | 25.19%     | 37.78%     | 50.38%     |       |
| Fall in consumption due to price increase  | -5.55%     | -11.11%    | -16.66%    | -22.22%    |       |
| Fall in consumption due to income decrease | -4.99%     | -4.99%     | -4.99%     | -4.99%     |       |
| Per capita consumption level               | 1,779.84   | 1,669.33   | 1,558.82   | 1,448.31   |       |
| Per capita consumption deterred            | 209.83     | 320.34     | 430.85     | 541.36     |       |
| Tax revenue per pack                       | €3.84      | €4.27      | €4.70      | €5.13      |       |
| Tax revenue per cigarette                  | €0.192     | €0.214     | €0.235     | €0.257     |       |
| Total tax revenue (€ billion)              | €3,336     | €3,478     | €3,575     | €3,625     |       |
| Incremental tax revenue (€ billion)        | €0,455     | €0,597     | €0,694     | €0,744     |       |
| Reduction in number of smokers             | 205,650    | 313,956    | 422,262    | 530,568    |       |
| Smoking related deaths averted             | high(0,50) | 930        | 1,420      | 1,911      | 2,401 |
|                                            | low(0,25)  | 465        | 710        | 955        | 1,200 |

*-Differences in calculations may occur due to rounding*

*-Impact of price increase shared between prevalence and consumption*

*-High estimate indicates that 50% of smokers' deaths are attributable to tobacco use, whereas low estimate indicates that 25% of smokers' deaths are attributable to tobacco use*

In all four scenarios, consumption is decreased substantially while tax revenue is still increased thanks to the inelastic demand. Moreover, smokers are significantly reduced and smoking related deaths are accordingly limited.

### Discussion

Price elasticity estimates are greater than previous research in Greece,[8, 23-24] but consistent with findings by Gallet and List.[20] Estimates for income elasticity are far greater than estimates provided by literature in Greece.[8, 21-23] Regarding antismoking campaigns, results are in agreement with previous testimony.[23-24] Smoking restrictions show no statistical significance, confirming the claims by Joosens and Raw that compliance is low.[17] Finally, results are in general agreement with Alpert et al,[27] though a different methodology is followed.

Paired with the still high cigarette affordability, as documented in the current study and reported by previous research,[6] the nature of demand in Greece presents a vast opportunity for the policy makers to counter the tobacco epidemic and ensure revenue and cash flows at the same time. Even supposing that other determinants of demand, such as income, which is anticipated to fall, do not change, tobacco taxation proves to be a powerful tool. Annual consumption per person over 15 would be no higher than 1,780 cigarettes, even in the worst case (scenario1) and may fall to less than 1,448 cigarettes. On the other hand, tax revenue would recover from the downwards trend, accounting again for more than 1.80% of GDP, even in scenario1. In absolute values, excess tobacco tax revenue could rejuvenate the dismantled public coffers. Results suggest that even with a modest 10% of tax revenue allocated to offsetting the tobacco epidemic, there would be more than enough disposable funds towards planning, implementing, evaluating and improving antismoking efforts. Greeks seem to be in agreement with heavy taxation on cigarettes, but only if respective revenue is attributed to tobacco control.[28] In terms of public health benefits, smokers could be reduced by nearly 530,568 people, while up to 2,401 smoking related deaths could be averted on an annual basis. Nonetheless, findings should be treated with caution and increases in price should not be excessively increased from day one, as the

1  
2  
3 smokers' reaction is not easy to predict with confidence intervals widened. A stepwise  
4  
5 increase of tax would eliminate many of the risks associated with a sharp and sudden  
6  
7 increase in cigarette prices. Besides, Greece already performs better in tax collection than  
8  
9 countries such as Germany, France and Slovenia among others,[26] as the excise per smoker  
10  
11 ratio indicates, with €738.71 collected for every smoker.  
12

13  
14 Income sensitivity is larger than in any previous study either in Greece or internationally.  
15  
16 Thus, it is not exaggerating to argue that Greek smokers are shocked by the constraint on  
17  
18 their income. Besides, it is the first time in at least 40 years that income in Greece is falling at  
19  
20 this rate. The austerity measures should be viewed as a shift event in cigarette consumption,  
21  
22 among others.  
23

24  
25 Reducing the toll of tobacco in Greece is not an easy task. Decisions should include fostering  
26  
27 an antismoking-culture through well-planned national antismoking campaigns, raising the  
28  
29 cigarettes prices at an initial level no less than €4 a pack and ensuring compliance with the  
30  
31 anti-smoking law, especially on the current occasion, when City Police (the main mechanism  
32  
33 of control on the matter) was recently abolished as an institution. Controlling illicit trade is  
34  
35 crucial to maximize the effect of interventions.  
36  
37

38  
39 As regards to the limitations of this study, it must be noted that addictions models were  
40  
41 unable to provide statistically significant information, possibly due to the inclusion of 2012  
42  
43 data in the time series. Possible future analysis of an even wider time series could provide  
44  
45 even more reliable results, as multicollinearity could be fully cured. Furthermore, the study  
46  
47 could be strengthened by employing statistical tests on more observations, regarding the  
48  
49 endogeneity of cigarette prices. Moreover, the current study is based on the most popular  
50  
51 price category in order to estimate the impact of prices changes on cigarette demand. It is  
52  
53 possible that a weighted average for all the brands sold in Greece could eliminate  
54  
55 unilateralism on prices data. Still, the anticipated but not fully documented switch of Greek  
56  
57  
58  
59  
60

1  
2  
3 smokers from manufactured cigarettes to hand-rolled tobacco should be taken into account  
4  
5 in any future research. Yet, if the increase of contraband cigarettes in the Greek market  
6  
7 could be quantified, results would be more punctual. In addition, tobacco shows synergistic  
8  
9 effect with other substances, such as alcohol. Thus, it would be meaningful to investigate  
10  
11 the combined effect of tobacco and alcohol from an economic aspect. Finally, researchers  
12  
13 argue that the increased availability of nicotine substitutes will reduce demand for tobacco  
14  
15 products and increase the price sensitivity as well.[19] Under that scope, if research included  
16  
17 nicotine substitutes, accuracy would be improved.  
18  
19  
20  
21  
22  
23  
24  
25  
26  
27  
28  
29  
30  
31  
32  
33  
34  
35  
36  
37  
38  
39  
40  
41  
42  
43  
44  
45  
46  
47  
48  
49  
50  
51  
52  
53  
54  
55  
56  
57  
58  
59  
60

1  
2  
3 **Acknowledgements:** We would like to express our gratitude to Professor Frank Chaloupka  
4  
5 for his valuable and constructive suggestions towards planning and development of this  
6  
7 research work. His willingness to provide us his limited time has been very much  
8  
9 appreciated.  
10

11  
12 **Contributorship Statement:** FT, DZ and AV performed the calculations and analyses  
13  
14 reported in the text. FT and KA reviewed the literature for relevant data and documentation.  
15  
16 FT and KA drafted the manuscript which was edited and critically revised by KA, AV and IK.  
17  
18

19  
20 **Funding:** This research received no specific grant from any funding agency in the public,  
21  
22 commercial or not-for-profit sectors.  
23

24  
25 **Competing interests:** None.  
26

27  
28 **Data Sharing:** Extra data is available by emailing FT.  
29  
30  
31  
32  
33  
34  
35  
36  
37  
38  
39  
40  
41  
42  
43  
44  
45  
46  
47  
48  
49  
50  
51  
52  
53  
54  
55  
56  
57  
58  
59  
60

## References

1. WHO. Global Health Risks: Mortality and burden of disease attributable to selected major risks. Geneva: World Health Organization 2009  
[http://www.who.int/healthinfo/global\\_burden\\_disease/GlobalHealthRisks\\_report\\_full.pdf](http://www.who.int/healthinfo/global_burden_disease/GlobalHealthRisks_report_full.pdf) (Accessed 14 Nov 2011).
2. Eriksen M, Mackay J, Ross H. The Tobacco Atlas. Fourth Ed. Atlanta, GA, American Cancer Society, New York: World Lung Foundation 2012.
3. WHO. WHO Global report: Mortality Attributable to Tobacco. Geneva: World Health Organization 2012  
[http://whqlibdoc.who.int/publications/2012/9789241564434\\_eng.pdf](http://whqlibdoc.who.int/publications/2012/9789241564434_eng.pdf) (Accessed 5 Oct 2012).
4. Filippidis FT, Vardavas CI, Loukopoulou A et al. Prevalence and determinants of tobacco use among adults in Greece: 4 year trends. Eur J Public Health 2013;23(5):772-776.
5. Vardavas CI, Kondilis B, Travers MJ et al. Environmental tobacco smoke in hospitality venues in Greece. BMC Public Health 2007;7(1):302.
6. Blecher EH, Van Walbeek CP. Cigarette affordability trends: an update and some methodological comments. Tobacco Control 2009;18(3):167-175.
7. Vardavas CI, Kafatos AG. Smoking policy and prevalence in Greece: an overview. The European Journal of Public Health 2007;17(2):211-213.
8. Hondroyannis G, Papapetrou E. Cigarette consumption in Greece: empirical evidence from cointegration analysis. Applied Economics Letters 1997;4:571-574
9. Ministry of Health and Social Solidarity. The Greek National Plan of Action against Cancer 2008-2012, Athens, 2008. [http://ygeiamap.gov.gr/wp-content/uploads/2013/05/karkinos\\_teliko.pdf](http://ygeiamap.gov.gr/wp-content/uploads/2013/05/karkinos_teliko.pdf) (Accessed 5 Oct 2011)
10. Hellenic Statistical Authority, Workforce research, Press release 19 September 2013,



1  
2  
3 <http://www.statistics.gr/portal/page/portal/ESYE/BUCKET/A0101/PressReleases/A0>  
4  
5 [101\\_SJO01\\_DT\\_QQ\\_02\\_2013\\_01\\_F\\_GR.pdf](http://www.statistics.gr/portal/page/portal/ESYE/BUCKET/A0101/PressReleases/A0101_SJO01_DT_QQ_02_2013_01_F_GR.pdf) (Accessed 7 November 2013)  
6

- 7  
8 11. Eurostat news release 26 February 2013, Eurostat press office  
9  
10 [http://europa.eu/rapid/press-release\\_STAT-13-28\\_en.htm](http://europa.eu/rapid/press-release_STAT-13-28_en.htm) (Accessed 27 February  
11 2013)  
12
- 13 12. Wilkins N, Yurekli A, Hu TW. Economic analysis of tobacco demand. Economics of  
14 Tobacco Toolkit. Washington: World Bank 2004  
15  
16 <http://siteresources.worldbank.org/INTPH/Resources/3Demand.pdf> (Accessed 24  
17 Nov 2011)  
18  
19
- 20 13. Godfrey C, Maynard A. Economic aspects of tobacco use and taxation policy. BMJ  
21 1998;297(6644):339–343.  
22
- 23 14. Kahende JW, Loomis BR, Adhikari B, Marshall L. A review of economic evaluations of  
24 tobacco control programs. Int J Environ Res Public Health 2009;6(1):51-68.  
25  
26
- 27 15. Farrelly M, Bray J. Responses to cigarette tax increases by race/ethnicity, income  
28 and age groups – United States, 1976–1993. Journal of the American Medical  
29 Association 1999;280:1979-1980.  
30  
31
- 32 16. Chaloupka F, Warner E. The economics of smoking. Handbook of Health Economics,  
33 2000;1:1539-1627.  
34  
35
- 36 17. Joossens L, Raw M. The tobacco control scale 2010 in Europe. Brussels: Association  
37 of European Cancer Leagues 2011.  
38  
39
- 40 18. WHO. Report on the Global Tobacco Epidemic, 2008: The MPOWER package.  
41 Geneva: World Health Organization 2008  
42  
43 [http://www.who.int/tobacco/mpower/mpower\\_report\\_full\\_2008.pdf](http://www.who.int/tobacco/mpower/mpower_report_full_2008.pdf) (Accessed 14  
44 Nov 2011).  
45  
46  
47  
48  
49  
50  
51  
52  
53  
54  
55  
56  
57  
58  
59  
60

- 1  
2  
3 19. Chaloupka F, Pacula R. The impact of price on youth tobacco use. Changing  
4 Adolescent Smoking Prevalence: Where It Is and Why, Smoking and Tobacco Control  
5 Monograph 1999:14.  
6  
7  
8  
9  
10 20. Gallet C, List J. Cigarette demand: A meta-analysis of elasticities. Health Econ  
11 2003;12:821-835.  
12  
13  
14 21. Stavrinou VG. The effects of an anti-smoking campaign on cigarette consumption:  
15 empirical evidence from Greece. Applied Economics 1987;19:323-329.  
16  
17  
18 22. Raptou E, Mattas K, Tsakiridou E et al. Factors affecting cigarette  
19 demand. International Advances in Economic Research 2005;11(3):275-290.  
20  
21  
22 23. Nikolaou A, Velentzas K. Estimating the Demand for Cigarettes in Greece: An Error  
23 Correction Model, Agricultural Economics Review 2001;2(1):20-27.  
24  
25  
26 24. Dritsakis E. Forecasting of cigarettes consumption in Greece: An empirical  
27 investigation with cointegration analysis. Agricultural Economic Review  
28 2003;4(2):47-56.  
29  
30  
31 25. Wasserman J, Manning WG, Newhouse JP et al. The Effects of Excise Taxes and  
32 Regulations on Cigarette Smoking. Journal of Health Economics 1991;10(1):43-64.  
33  
34  
35 26. Ross HZ, Shariff S, Gilmore A. Economics of Tobacco Taxation in Russia. Paris:  
36 International Union Against Tuberculosis and Lung Disease 2008.  
37  
38  
39 27. Alpert HR, Vardavas CI, Chaloupka FJ et al. The recent and projected public health  
40 and economic benefits of cigarette taxation in Greece. Tobacco Control 2013 Mar 6.  
41 [Epub ahead of print]  
42  
43  
44 28. Vardavas CI, Filippidis FT, Agaku I et al. Tobacco taxation: the importance of  
45 earmarking the revenue to health care and tobacco control. Tobacco induced  
46 diseases 2012;10(1):21.  
47  
48  
49  
50  
51  
52  
53  
54  
55  
56  
57  
58  
59  
60

**Estimates of price and income elasticity in Greece:**

**Greek debt crisis transforming cigarettes into a luxury good - an econometric approach**

Tarantilis F<sup>1</sup>, Athanasakis K<sup>1</sup>, [Zavras D<sup>1</sup>](#), Vozikis A<sup>2</sup>, Kyriopoulos I<sup>1</sup>

<sup>1</sup>National School of Public Health, Athens, Greece

<sup>2</sup>Department of Economics, University of Piraeus, Athens, Greece

Corresponding author: Filippos Tarantilis, Department of Health Economics, National School of Public Health, 196 Alexandras Av., Athens, 11521, Greece, [fil\\_t@hotmail.com](mailto:fil_t@hotmail.com), Phone No: 00302132010242, Fax No: 00302106449571

Kostas Athanasakis, National School of Public Health, Department of Health Economics, Athens, Greece

[Dimitris Zavras, National School of Public Health, Department of Health Economics, Athens, Greece](#)

Athanassios Vozikis, University of Piraeus, Department of Economics, Athens, Greece

Ioannis Kyriopoulos, National School of Public Health, Department of Health Economics, Athens, Greece

Keywords: smoking, taxation, price elasticity, income elasticity

Word count: [3,0412,909 \(without abstract, article summary, headings, tables, contributorship statement, acknowledgements, funding, competing interests and data sharing\)](#)

**Abstract**

**Objective:** During the past decades, smoking prevalence in Greece was estimated near or over 40%. Following a sharp fall in newest data on cigarette consumption, our objective is to

Field Code Changed

1  
2  
3  
4  
5  
6 assess smokers' sensitivity to cigarette price and consumer income changes as well as to  
7 project health benefits of an additional tax increase.  
8

9  
10 **Methods:** Cigarette consumption was considered as the dependent variable, with Weighted  
11 Average Price as a proxy for cigarette price, GDP as a proxy for consumers' income and  
12 dummy variables reflecting smoking restrictions and antismoking campaigns. Values were  
13 computed to natural logarithms and regression was performed. Then, 4 scenarios of tax  
14 increase were distinguished in order to calculate potential health benefits.  
15  
16  
17  
18  
19

20  
21 **Results:** ~~Addiction models were unable to provide statistically significant information due to~~  
22 ~~a nearly 23.5% drop in consumption during 2012.~~ Short-run price elasticity is estimated at -  
23 0.441 and short-run income elasticity is estimated at 1.040. Antismoking campaigns were  
24 found to have a statistically significant impact on consumption. Results indicate that,  
25 depending on the level of tax increase, annual per capita consumption could fall by at least  
26 209.83 cigarettes; tax revenue could rise up by more than €0.74 billion, while smokers could  
27 be reduced by up to 530,568 and at least 465 smoking related deaths could be averted.  
28  
29  
30  
31  
32  
33

34  
35 **Conclusions:** Price elasticity estimates are similar to previous studies in Greece, while  
36 income elasticity estimates are far greater. With cigarettes regarded as a luxury good, a  
37 great opportunity is presented for decision-makers to counter smoking. Increased taxation,  
38 along with focused antismoking campaigns, law reinforcement (to ensure compliance with  
39 smoking bans) and intensive control for smuggling could invoke a massive blow to the  
40 tobacco epidemic in Greece.  
41  
42  
43  
44  
45  
46

47 **Article Summary Strengths and limitations of this study**

- 48  
49  
50  
51  
52  
53  
54  
55  
56  
57  
58  
59  
60
- The article offers information to policy makers regarding price elasticity, a key measure to perform tobacco control policy

Formatted: Font: Not Bold, No underline

- 1  
2  
3  
4  
5  
6  
7  
8  
9  
10  
11  
12  
13  
14  
15  
16  
17  
18  
19  
20  
21  
22  
23  
24  
25  
26  
27  
28  
29  
30  
31  
32  
33  
34  
35  
36  
37  
38  
39  
40  
41  
42  
43  
44  
45  
46  
47  
48  
49  
50  
51  
52  
53  
54  
55  
56  
57  
58  
59  
60
- The article reports, for the first time, an income elasticity above 1, as evidence that cigarettes tend to be considered a luxury good in Greece
  - The analysis treats qualitative variables and projects health and financial benefits under extreme austerity
  - The analysis could not include dynamic (addiction) models, as no statistical significance was reported

## Introduction

### Country Profile

Globally, more than 5 million people die every year from tobacco use, while tobacco use is the second leading cause of death, representing the 8.7% of global annual mortality .[1] As global tobacco consumption in 2009 was estimated at 5884 billion cigarettes,[2] tobacco clearly reflects the global transition from traditional risks such as undernutrition, unsafe sex, unsafe water, poor sanitation and hygiene to modern risks like physical inactivity, behavior risks and air quality.[1] In Greece, WHO estimations attribute 17% of mortality for people aged 30 or more to smoking.[3] Death rate attributed to tobacco and the proportion of deaths attributable to tobacco for ages 30 and over is documented in the following table (Table 1).

Table 1: Estimated death rated (per 100.000) and proportion attributable to tobacco for ages 30 and over, 2004 in Greece [3]

| Cause of death               | Death rate attributed to tobacco | Proportion of deaths attributable to tobacco |
|------------------------------|----------------------------------|----------------------------------------------|
| Lower respiratory infections | 3                                | 23%                                          |
| Malignant neoplasms          | 110                              | 29%                                          |
| Cardiovascular diseases      | 90                               | 12%                                          |
| Respiratory diseases         | 23                               | 37%                                          |

Little less than half Greek citizens (41%) are smokers.[4] Youth smoking is also high, 11.3% for young men and 9% for young women.[2] Environmental Tobacco Smoke (ETS) also represents a serious problem in Greece, as documented by previous research.[5]

Concerning cigarette affordability, findings suggest that Greece is one of the few high-income European Union countries with relatively low cigarette prices.[6] Low prices can be recognized as a factor for the tobacco epidemic in Greece.[7] According to own calculations,

1  
2  
3  
4  
5  
6 for the period 1992-2012, cigarette affordability, defined as the percentage of income  
7 needed to purchase 100 packs of cigarettes, was estimated from 0.56% to 1.98%.

8  
9  
10 The first organized efforts to counter smoking in Greece were observed during 1979-1982.  
11  
12 At the moment, in Greece, tobacco advertising bans are complete, except for point-of-sale  
13  
14 advertising.

15  
16  
17 Tax revenue from tobacco products is arguably very important for the economic policy. In  
18  
19 1990, tax revenue accounted for 4.4% of GDP.[8] For the period 1998-2010 tobacco tax  
20  
21 revenue stood for an annual average 2% of GDP, but it seems to follow a downwards trend.

22  
23  
24 Official estimates measure the total annual direct cost of smoking a €2.14 billion, in an  
25  
26 environment where debt crisis and austerity measures set serious constraints to the health  
27  
28 system and resources should, now more than ever, be allocated properly. [9] Tobacco's  
29  
30 unfavorable consequences on the poor could become a factor, where unemployment rates  
31  
32 are estimated at 27.1% for the 2<sup>nd</sup> quarter of 2013, continuing to grow from under 900,000  
33  
34 to approximately 1,350,000 people in the last 24 months.[10] Moreover, 31% of the total  
35  
36 population is at risk of poverty or social exclusion.[11]

### 37 38 Tobacco Market and government interventions

39  
40 Three market failures differentiate an individual's choice to smoke compared to the decision  
41  
42 to consume other goods: information failure on the health hazard of smoking, information  
43  
44 failure on the addiction caused by smoking and external burden to non-smokers.[12]  
45  
46 Therefore, government intervention is justified in order both to protect smokers from the  
47  
48 perilous habit and correct for externalities associated to smoking. From a basic economics'  
49  
50 standpoint, it can be claimed that smoking's immense social burden overtakes the loss of  
51  
52 consumer's utility or else the loss of economic efficiency (deadweight loss). -A hypothetical  
53  
54  
55  
56  
57  
58  
59  
60

example on how the deadweight loss emerges, after the introduction of tax, is illustrated in figures (Figure 1 and Figure 2).

Tobacco taxation is imposed through a variety of structures but, in nearly all cases, includes two main types of tax: Ad valorem tax, which represents a percentage of price and specific tax, which is a fixed tax per cigarette. In Greece, following the 2010 restructure of tobacco tax, total tax represents 86% of the retail price, significantly increased compared to the 2009 level and 2008 level when is represented 83% and 70% of the retail price respectively (WHO, 2011). In 2012, specific excise tax was regulated at €80 per 1,000 cigarettes and ad valorem tax at 20% of the retail price. Their minimum sum is required to be no less than €115 per 1,000 cigarettes. Meanwhile, a specific excise tax was set at €153 per kg of hand-rolled tobacco. Sales tax for cigarettes is fixed at 23% of the retail price.

Price increases should not be regarded the only way to reduce consumption, as the impact of income, advertising and health education are also important.[13] Manipulating these variables will result to reduced consumption and eventually reduced mortality and morbidity. Tobacco control programs and policies are found to be either cost-saving or cost-effective, compared to other public health interventions such as cardiovascular risk counseling and cancer screening.[14] Research on the impact of tobacco control showed that during 1981-2000, increases in tobacco control program expenditures in the U.S.A. lead to reduced cigarettes sales. Authors also suggest that expenditures have an even stronger lagged influence on sales.[15] Smoking bans are adopted in order to limit exposure to smoke but also cause a remarkable decrease in cigarette consumption, as smokers' opportunities to smoke are lessened.[16] In Greece, the effort to restrict smoking in public places through legislation has failed due to low compliance with law.[17] Youth exposed to secondhand smoke at home are estimated at 89.8% of total youth population.[2] Public education campaigns, if "hard-hitting, sophisticated and sustained", can be extremely effective.[18]



### Price and income elasticities

The term used to measure the impact of a change in price on consumption is price elasticity of demand, defined as the percentage change in consumption that results from 1 percent increase in price.[19] Similarly, the impact of a change in income on consumption is measured by income elasticity, defined as the percentage change in consumption resulting from 1 percent increase in income. Estimating elasticity is crucial to policy makers in order not only to anticipate an intervention's impact both on tobacco consumption and tobacco tax revenue. If the proportionate fall in tobacco consumption exceeds the proportionate increase of tax, revenue will fall. Otherwise, revenue will rise.[16]

Results from a meta-analysis,[20] indicate that short run elasticity (-0.40) is lower than long run elasticity (-0.44), while in studies that included smuggling demand was less sensitive (-0.36). These findings confirm the general notion that a 10% increase in price would lead to a 4% reduction in consumption in high-income countries.[18] Stavrinou estimated the short run price elasticity at -0.079 and the long run at -0.147, while income elasticity is estimated at 0.18 and 0.33, respectively.[21] Hondroyannis and Papapetrou, based on data over the period 1967-1990, calculated the short run price elasticity at -0.33 and the long run at -0.6, while income elasticity estimations are 0.35 and 0.54, respectively. The fact that demand is inelastic is explained by the authors through addiction and the absence of direct substitutes. Furthermore, it is claimed that health warnings are more effective in reducing consumption than price increases.[9] Raptou and colleagues conclude in an income elasticity of 0.28, consisting of initiation elasticity (0.21) and consumption elasticity (0.07), arguing that income is a more important determinant for initiation rather than consumption. Furthermore, smoking bans are illustrated as a factor discouraging tobacco consumption.[22] Nikolaou and Velentzas, based on data from 1960 to 1995, estimated the short run price elasticity at -0.24 and the long run at -0.48, while income elasticity is

1  
2  
3  
4  
5  
6 estimated at 0.19 and 0.40, respectively. Advertising had a positive but non-significant effect  
7  
8 on demand and antismoking campaigns had a negative but non-significant effect on  
9  
10 demand.[23] On the other hand, health warnings on packs during 1987-1990 had a  
11  
12 significant negative impact on demand, lowering consumption by 4.2%. Dritsakis notes that  
13  
14 consumption is a negative function of price and health education expenditure and a positive  
15  
16 function of income as well.[24]

17  
18 As illustrated, there are no studies of price elasticity available for at least a decade. In the  
19  
20 light of the above, the purpose of the present study was to investigate cigarette demand in  
21  
22 Greece.

### 23 24 **Method**

25  
26 The tobacco product used in analysis is cigarettes, widely accepted as the major tobacco  
27  
28 product. In order to account for population growth, annual consumption per person over 15  
29  
30 was preferred to aggregate annual consumption. The threshold age was set at 15, as youth  
31  
32 smoking in Greece is considered substantial. Data on annual cigarette consumption are  
33  
34 available from 1994 onwards [\(1994-2012\) from the Greek Ministry of Finance](#).

35  
36  
37 ~~Monthly (and quarterly) data on the quantities of taxed cigarettes were available from 2007~~  
38  
39 ~~to 2011.~~ As excise tax data were not available and MPPC (Most Popular Price Category)  
40  
41 shows inconsistency due to pricing policy, the measure chosen to reflect price was the  
42  
43 Weighted Average Price. Each pack consists of 20 cigarettes. The proxy used to deflate  
44  
45 nominal into real prices was calculated by comparing real and nominal values of GDP (Gross  
46  
47 Domestic Product) derived from World Bank. CPI (Consumer Price Index) was not selected as  
48  
49 a proxy due to a change in calculations by Hellenic Statistical Authority in 1995, when  
50  
51 General Harmonized Consumer Price Index was introduced. The base year set was 2005.  
52  
53 Disposable income data were based at GDP. Again, the threshold age was set at 15.  
54  
55  
56  
57  
58  
59  
60

Deflation was not needed in that case, as real values were available. The base year set was 2005. Prior to 2008, national informative campaigns were not run in Greece at a national level. We considered The National Action Plan for Cancer (2008) as an anti-smoking campaign. A dummy variable was used to measure its influence on consumption. Expenditure on tobacco control was not available. Regulation for smoking bans and restrictions was only introduced in 2002 and amended in 2010. In order to measure its influence on consumption, an adjusted version of a previous reliable index was constructed, accounting not only for intensity of smoking restrictions but for compliance as well.[25] Values attributed were between 0 (no restrictions) to 1 (total ban) escalating by 0.25.

~~Regression analysis includes only a static model, as dynamic models (incorporating models) show limited statistical significance, due to the inclusion of 2012 data in the time series.~~

~~Data were analyzed with the statistical software packages SPSS® 20 and STATA® 9. The functional form used in the analysis was Double-log and values were transformed to natural logarithms in order to increase reliability. Testing for endogeneity of cigarette prices was not possible as the annual tax rates were only available from 2008 onwards. Time trend was found to be insignificant; therefore, it is excluded from the equations. The models of demand was/were specified as follows.~~

*Conventional Demand Model*

$$\ln Q_t = b_0 + b_1 \ln P_t + b_2 \ln Y_t + b_3 SR_t + b_4 ASC_t + \varepsilon_t$$

~~*Myopic Addiction Model*~~

~~$$\ln Q_t = b_0 + b_1 \ln P_t + b_2 \ln Y_t + b_3 SR_t + b_4 ASC_t + b_5 \ln Q_{t-1} + \varepsilon_t$$~~

~~*Rational Addiction Model*~~

~~$$\ln Q_t = b_0 + b_1 \ln P_t + b_2 \ln Y_t + b_3 SR_t + b_4 ASC_t + b_5 \ln Q_{t-1} + b_6 \ln Q_{t+1} + \varepsilon_t$$~~

Where,

Formatted: Font: Italic, English (U.S.)

Formatted: Underline, English (U.S.)

Formatted: Underline

Formatted: Underline, English (U.S.)

Formatted: Font: Italic, English (U.S.)

Formatted: Underline, English (U.S.)

Formatted: Underline

Formatted: Underline, English (U.S.)

1  
2  
3  
4  
5  
6  $Q_t$  : consumption of cigarettes per person over 15 (000 cigarettes) in year t  
7

8  
9  $Q_{t-1}$  : consumption of cigarettes per person over 15(000 cigarettes) in year t-1

Formatted: English (U.S.)

10  
11  $Q_{t+1}$  : consumption of cigarettes per person over 15(000 cigarettes) in year t+1

Formatted: English (U.S.)

Formatted: English (U.S.)

12  
13  $P_t$  : real retail price per pack of 20 cigarettes in year t  
14

Formatted: English (U.S.)

Formatted: English (U.S.)

15  
16  $Y_t$  : real per person over 15 disposable income (€000-€) in year t  
17

18  
19  $b_0$  : intercept in year t  
20

21  
22  $SR_t$  : index of smoking restrictions or bans according to law in year t  
23

24  
25  $AsC_t$  : dummy checking dichotomous index reflecting the existence of an anti-smoking  
26 campaign each year t  
27

28  
29  $\varepsilon_t$  : the error term  
30  
31  
32  
33  
34  
35  
36  
37  
38  
39  
40  
41  
42  
43  
44  
45  
46  
47  
48  
49  
50  
51  
52  
53  
54  
55  
56  
57  
58  
59  
60

## Results

Through the conventional model of demand, the demand equation was estimated as follows

(Table 2):

Table 2: Conventional model of demand equation

|                                                                                                                                      |                 |                      |
|--------------------------------------------------------------------------------------------------------------------------------------|-----------------|----------------------|
| $\ln Q_t = -1.757 - 0.441 \cdot \ln P_t + 1.040 \cdot \ln Y_t - 0.132 \cdot \text{AsC}_t$                                            |                 |                      |
| F-statistic: 27.765                                                                                                                  | R square: 0.847 | Durbin-Watson: 1.980 |
| Skewness/Kurtosis tests for Normality: adj chi <sup>2</sup> = 5.10, Prob>chi <sup>2</sup> = 0.0780                                   |                 |                      |
| Breusch-Pagan / Cook-Weisberg test for heteroskedasticity: chi <sup>2</sup> = 2.56, Prob>chi <sup>2</sup> = 0.1093                   |                 |                      |
| Dickey-Fuller test for unit root: Z(t) = -2.364, 1% critical value = -2.660, 5% critical value = -1.950, 10% critical value = -1.600 |                 |                      |

Formatted: Superscript

Formatted: Superscript

Formatted: English (U.S.)

A regression analysis was performed and calculations were made stepwise. The variable created to capture the effect of smoking restrictions was found non-significant (p value asymptotically equal to 0.303 at 5% confidence level); thus, it is excluded from the model. P value at 5% confidence level is asymptotically equal to 0 for  $\ln Y_t$ , equal to 0.001 for  $\ln P_t$  and equal to 0.021 for  $\text{AsC}_t$ . The F-statistic is high, showing a good level of fit, while the model explains a great part of the variation. The Durbin-Watson statistic is close to 2, suggesting that the model has no autocorrelation. The Variation Inflated Factor is low for all variables, implying that multicollinearity is a non-factor. As evidenced by normality tests, standardized residuals follow a normal distribution. Breusch-Pagan / Cook-Weisberg tests indicate that residuals are homoscedastic. The Augmented Dickey-Fuller test for standardized residuals confirms that there exist no unit roots. Therefore, the standardized residuals are stationary, so the variables of the model are cointegrated (without constant and trend) and the

1  
2  
3  
4  
5  
6 regression is not spurious. In the light of the above, we accept a short-run price elasticity of  
7  
8 demand at 0.441 and a short-run income elasticity of demand at 1.040.

9  
10  
11 Through the myopic addiction model, the additional variable ( $\ln Q_{t-1}$ ) shows no statistical  
12 significance. Therefore the model remains unchanged. Through the rational addiction  
13 model, only the variable representing following year's consumption ( $\ln Q_{t+1}$ ) is found  
14 significant (p value asymptotically equal to 0), with substantially lower levels of fit (R  
15 square). Thus, we conclude that addiction models fail to offer additional information on how  
16 consumption is influenced.

17  
18  
19  
20 Based on 2010 data, nominal tax revenue per pack is calculated at €2.78, a value verifying  
21  
22 and corresponding to the fixed amount of tax (86% of the nominal retail price). We assume  
23  
24 that the state maintains the existing ability to collect tribute. Government proclamations  
25  
26 suggest that tobacco will be further taxed. Therefore, we distinct four scenarios, all with  
27  
28 retail price increases, as anticipated, and each suggesting an additional price increase by  
29  
30 €0.5. Calculations are made only for the following year and accordingly only short run  
31  
32 elasticity is taken into account. Scenarios capture the impact of the continuing fall in income  
33  
34 at a rate of 4.8%. Based on Ross et al methodology and data concerning tobacco-related  
35  
36 mortality in Greece (Lower respiratory infections, Malignant neoplasms, Cardiovascular  
37  
38 diseases and Respiratory diseases), we estimate reduction on smokers and mortality  
39  
40 averted.[3,26]  
41  
42  
43  
44  
45  
46  
47  
48  
49  
50  
51  
52  
53  
54  
55  
56  
57  
58  
59  
60

Formatted: Font: Not Bold, No underline

Formatted: Font: Not Bold, No underline

Formatted: Line spacing: 1.5 lines

Formatted: Font: Not Bold, No underline,  
Subscript

Formatted: Font: Not Bold, No underline,  
Subscript

Formatted: Font: Not Bold, No underline

Table 32: Impact of price increase and income constraints on consumption, tax revenue, number of smokers and smoking related deaths

| Model scenarios                            | Scenario 1 | Scenario 2 | Scenario 3 | Scenario 4 |       |
|--------------------------------------------|------------|------------|------------|------------|-------|
| Price per pack                             | €4.47      | €4.97      | €5.47      | €5.97      |       |
| Percent increase of price                  | 12.59%     | 25.19%     | 37.78%     | 50.38%     |       |
| Fall in consumption due to price increase  | -5.55%     | -11.11%    | -16.66%    | -22.22%    |       |
| Fall in consumption due to income decrease | -4.99%     | -4.99%     | -4.99%     | -4.99%     |       |
| Per capita consumption level               | 1,779.84   | 1,669.33   | 1,558.82   | 1,448.31   |       |
| Per capita consumption deterred            | 209.83     | 320.34     | 430.85     | 541.36     |       |
| Tax revenue per pack                       | €3.84      | €4.27      | €4.70      | €5.13      |       |
| Tax revenue per cigarette                  | €0.192     | €0.214     | €0.235     | €0.257     |       |
| Total tax revenue (€ billion)              | €3,336     | €3,478     | €3,575     | €3,625     |       |
| Incremental tax revenue (€ billion)        | €0,455     | €0,597     | €0,694     | €0,744     |       |
| Reduction in number of smokers             | 205,650    | 313,956    | 422,262    | 530,568    |       |
| Smoking related deaths averted             | high(0,50) | 930        | 1,420      | 1,911      | 2,401 |
|                                            | low(0,25)  | 465        | 710        | 955        | 1,200 |

-Differences in calculations may occur due to rounding

-Impact of price increase shared between prevalence and consumption

-High estimate indicates that 50% of smokers' deaths are attributable to tobacco use, whereas low estimate indicates that 25% of smokers' deaths are attributable to tobacco use

In all four scenarios, consumption is decreased substantially while tax revenue is still increased thanks to the inelastic demand. Moreover, smokers are significantly reduced and smoking related deaths are accordingly limited.

## Discussion

Price elasticity estimates are greater than previous research in Greece,[8, 23-24] but consistent with findings by Gallet and List.[20] Estimates for income elasticity are far greater than estimates provided by literature in Greece.[8, 21-23] Regarding antismoking campaigns, results are in agreement with previous testimony.[23-24] Smoking restrictions show no statistical significance, confirming the claims by Joosens and Raw that compliance is low.[17] Finally, results are in general agreement with Alpert et al,[27] though a different methodology is followed.

Paired with the still high cigarette affordability, as documented in the current study and reported by previous research,[6] the nature of demand in Greece presents a vast opportunity for the policy makers to counter the tobacco epidemic and ensure revenue and cash flows at the same time. Even supposing that other determinants of demand, such as income, which is anticipated to fall, do not change, tobacco taxation proves to be a powerful tool. Annual consumption per person over 15 would be no higher than 1,780 cigarettes, even in the worst case (scenario1) and may fall to less than 1,448 cigarettes. On the other hand, tax revenue would recover from the downwards trend, accounting again for more than 1.80% of GDP, even in scenario1. In absolute values, excess tobacco tax revenue could rejuvenate the dismantled public coffers. Results suggest that even with a modest 10% of tax revenue allocated to offsetting the tobacco epidemic, there would be more than enough disposable funds towards planning, implementing, evaluating and improving antismoking efforts. Greeks seem to be in agreement with heavy taxation on cigarettes, but only if respective revenue is attributed to tobacco control.[28] In terms of public health benefits, smokers could be reduced by nearly 530,568 people, while up to 2,401 smoking related deaths could be averted on an annual basis. Nonetheless, findings should be treated with caution and increases in price should not be excessively increased from day one, as the



1  
2  
3  
4  
5  
6 smokers' reaction is not easy to predict with confidence intervals widened. A stepwise  
7  
8 increase of tax would eliminate many of the risks associated with a sharp and sudden  
9  
10 increase in cigarette prices. Besides, Greece already performs better in tax collection than  
11  
12 countries such as Germany, France and Slovenia among others,[26] as the excise per smoker  
13  
14 ratio indicates, with €738.71 collected for every smoker.

15  
16 Income sensitivity is larger than in any previous study either in Greece or internationally.  
17  
18 Thus, it is not exaggerating to argue that Greek smokers are shocked by the constraint on  
19  
20 their income. Besides, it is the first time in at least 40 years that income in Greece is falling at  
21  
22 this rate. The austerity measures should be viewed as a shift event in cigarette consumption,  
23  
24 among others.

25  
26 Reducing the toll of tobacco in Greece is not an easy task. Decisions should include fostering  
27  
28 an antismoking-culture through well-planned national antismoking campaigns, raising the  
29  
30 cigarettes prices at an initial level no less than €4 a pack and ensuring compliance with the  
31  
32 anti-smoking law, especially on the current occasion, when City Police (the main mechanism  
33  
34 of control on the matter) was recently abolished as an institution. Controlling illicit trade is  
35  
36 crucial to maximize the effect of interventions.

37  
38  
39 As regards to the limitations of this study, it must be noted that addictions models were  
40  
41 unable to provide statistically significant information, possibly due to the inclusion of 2012  
42  
43 data in the time series. Possible future analysis of an even wider time series could provide  
44  
45 even more reliable results, as multicollinearity could be fully cured. Furthermore, the study  
46  
47 could be strengthened by employing statistical tests on more observations, regarding the  
48  
49 endogeneity of cigarette prices. Moreover, the current study is based on the most popular  
50  
51 price category in order to estimate the impact of prices changes on cigarette demand. It is  
52  
53 possible that a weighted average for all the brands sold in Greece could eliminate  
54  
55 unilateralism on prices data. Still, the anticipated but not fully documented switch of Greek  
56  
57  
58  
59  
60

1  
2  
3  
4  
5  
6 smokers from manufactured cigarettes to hand-rolled tobacco should be taken into account  
7  
8 in any future research. Yet, if the increase of contraband cigarettes in the Greek market  
9  
10 could be quantified, results would be more punctual. In addition, tobacco shows synergistic  
11  
12 effect with other substances, such as alcohol. Thus, it would be meaningful to investigate  
13  
14 the combined effect of tobacco and alcohol from an economic aspect. Finally, researchers  
15  
16 argue that the increased availability of nicotine substitutes will reduce demand for tobacco  
17  
18 products and increase the price sensitivity as well.[19] Under that scope, if research included  
19  
20 nicotine substitutes, accuracy would be improved.  
21  
22  
23  
24  
25  
26  
27  
28  
29  
30  
31  
32  
33  
34  
35  
36  
37  
38  
39  
40  
41  
42  
43  
44  
45  
46  
47  
48  
49  
50  
51  
52  
53  
54  
55  
56  
57  
58  
59  
60

1  
2  
3  
4  
5  
6 **Contributorship Statement:** FT, [DZ](#) and AV performed the calculations and analyses  
7 reported in the text. FT and KA reviewed the literature for relevant data and documentation.  
8

9  
10 FT and KA drafted the manuscript which was edited and critically revised by KA, [AV](#) and IK.  
11

### 12 **Acknowledgements**

13  
14 We would like to express our gratitude to Professor Frank Chaloupka for his valuable and  
15 constructive suggestions towards planning and development of this research work. His  
16 willingness to provide us his limited time has been very much appreciated.  
17  
18  
19

20  
21 **Funding:** ~~None.~~ [This research received no specific grant from any funding agency in the](#)  
22 [public, commercial or not-for-profit sectors.](#)  
23  
24

25  
26 **Competing interests:** None.  
27

28  
29 **Data Sharing:** Extra data is available by emailing FT.  
30  
31  
32  
33  
34  
35  
36  
37  
38  
39  
40  
41  
42  
43  
44  
45  
46  
47  
48  
49  
50  
51  
52  
53  
54  
55  
56  
57  
58  
59  
60

## References

1. WHO. Global Health Risks: Mortality and burden of disease attributable to selected major risks. Geneva: World Health Organization 2009  
[http://www.who.int/healthinfo/global\\_burden\\_disease/GlobalHealthRisks\\_report\\_full.pdf](http://www.who.int/healthinfo/global_burden_disease/GlobalHealthRisks_report_full.pdf) (Accessed 14 Nov 2011).
2. Eriksen M, Mackay J, Ross H. The Tobacco Atlas. Fourth Ed. Atlanta, GA, American Cancer Society, New York: World Lung Foundation 2012.
3. WHO. WHO Global report: Mortality Attributable to Tobacco. Geneva: World Health Organization 2012  
[http://whqlibdoc.who.int/publications/2012/9789241564434\\_eng.pdf](http://whqlibdoc.who.int/publications/2012/9789241564434_eng.pdf) (Accessed 5 Oct 2012).
4. Filippidis FT, Vardavas CI, Loukopoulou A et al. Prevalence and determinants of tobacco use among adults in Greece: 4 year trends. Eur J Public Health 2013;23(5):772-776.
5. Vardavas CI, Kondilis B, Travers MJ et al. Environmental tobacco smoke in hospitality venues in Greece. BMC Public Health 2007;7(1):302.
6. Blecher EH, Van Walbeek CP. Cigarette affordability trends: an update and some methodological comments. Tobacco Control 2009;18(3):167-175.
7. Vardavas CI, Kafatos AG. Smoking policy and prevalence in Greece: an overview. The European Journal of Public Health 2007;17(2):211-213.
8. Hondroyiannis G, Papapetrou E. Cigarette consumption in Greece: empirical evidence from cointegration analysis. Applied Economics Letters 1997;4:571-574
9. Ministry of Health and Social Solidarity. The Greek National Plan of Action against Cancer 2008-2012, Athens, 2008. [http://ygeiamap.gov.gr/wp-content/uploads/2013/05/karkinos\\_teliko.pdf](http://ygeiamap.gov.gr/wp-content/uploads/2013/05/karkinos_teliko.pdf) (Accessed 5 Oct 2011)
10. Hellenic Statistical Authority, Workforce research, Press release 19 September 2013,

Field Code Changed

Field Code Changed

Field Code Changed

1  
2  
3  
4  
5  
6 [http://www.statistics.gr/portal/page/portal/ESYE/BUCKET/A0101/PressReleases/A0101\\_SJO01\\_DT\\_QQ\\_02\\_2013\\_01\\_F\\_GR.pdf](http://www.statistics.gr/portal/page/portal/ESYE/BUCKET/A0101/PressReleases/A0101_SJO01_DT_QQ_02_2013_01_F_GR.pdf) (Accessed 7 November 2013)

Field Code Changed

10 11. Eurostat news release 26 February 2013, Eurostat press office  
12 [http://europa.eu/rapid/press-release\\_STAT-13-28\\_en.htm](http://europa.eu/rapid/press-release_STAT-13-28_en.htm) (Accessed 27 February  
13 2013)

Field Code Changed

15 12. Wilkins N, Yurekli A, Hu TW. Economic analysis of tobacco demand. Economics of  
16 Tobacco Toolkit. Washington: World Bank 2004  
17 <http://siteresources.worldbank.org/INTPH/Resources/3Demand.pdf> (Accessed 24  
18 Nov 2011)

Field Code Changed

20 13. Godfrey C, Maynard A. Economic aspects of tobacco use and taxation policy. BMJ  
21 1998;297(6644):339–343.

23 14. Kahende JW, Loomis BR, Adhikari B, Marshall L. A review of economic evaluations of  
24 tobacco control programs. Int J Environ Res Public Health 2009;6(1):51-68.

26 15. Farrelly M, Bray J. Responses to cigarette tax increases by race/ethnicity, income  
27 and age groups – United States, 1976–1993. Journal of the American Medical  
28 Association 1999;280:1979-1980.

30 16. Chaloupka F, Warner E. The economics of smoking. Handbook of Health Economics,  
31 2000;1:1539-1627.

33 17. Joossens L, Raw M. The tobacco control scale 2010 in Europe. Brussels: Association  
34 of European Cancer Leagues 2011.

36 18. WHO. Report on the Global Tobacco Epidemic, 2008: The MPOWER package.  
37 Geneva: World Health Organization 2008

39 [http://www.who.int/tobacco/mpower/mpower\\_report\\_full\\_2008.pdf](http://www.who.int/tobacco/mpower/mpower_report_full_2008.pdf) (Accessed 14  
40 Nov 2011).

Field Code Changed

- 1  
2  
3  
4  
5  
6 19. Chaloupka F, Pacula R. The impact of price on youth tobacco use. Changing  
7 Adolescent Smoking Prevalence: Where It Is and Why, Smoking and Tobacco Control  
8 Monograph 1999:14.  
9
- 10  
11 20. Gallet C, List J. Cigarette demand: A meta-analysis of elasticities. Health Econ  
12 2003;12:821-835.  
13
- 14  
15 21. Stavrinou VG. The effects of an anti-smoking campaign on cigarette consumption:  
16 empirical evidence from Greece. Applied Economics 1987;19:323-329.  
17
- 18  
19 22. Raptou E, Mattas K, Tsakiridou E et al. Factors affecting cigarette  
20 demand. International Advances in Economic Research 2005;11(3):275-290.  
21
- 22  
23 23. Nikolaou A, Velentzas K. Estimating the Demand for Cigarettes in Greece: An Error  
24 Correction Model, Agricultural Economics Review 2001;2(1):20-27.  
25
- 26  
27 24. Dritsakis E. Forecasting of cigarettes consumption in Greece: An empirical  
28 investigation with cointegration analysis. Agricultural Economic Review  
29 2003;4(2):47-56.  
30
- 31  
32 25. Wasserman J, Manning WG, Newhouse JP et al. The Effects of Excise Taxes and  
33 Regulations on Cigarette Smoking. Journal of Health Economics 1991;10(1):43-64.  
34
- 35  
36 26. Ross HZ, Shariff S, Gilmore A. Economics of Tobacco Taxation in Russia. Paris:  
37 International Union Against Tuberculosis and Lung Disease 2008.  
38
- 39  
40 27. Alpert HR, Vardavas CI, Chaloupka FJ et al. The recent and projected public health  
41 and economic benefits of cigarette taxation in Greece. Tobacco Control 2013 Mar 6.  
42 [Epub ahead of print]  
43
- 44  
45 28. Vardavas CI, Filippidis FT, Agaku I et al. Tobacco taxation: the importance of  
46 earmarking the revenue to health care and tobacco control. Tobacco induced  
47 diseases 2012;10(1):21.  
48  
49  
50  
51  
52  
53  
54  
55  
56  
57  
58  
59  
60

1  
2  
3  
4  
5  
6 Figures  
7

8  
9 Figure 1: The demand curve before government intervention  
10

11  
12 Figure 2: The demand curve after government intervention  
13  
14  
15  
16  
17  
18  
19  
20  
21  
22  
23  
24  
25  
26  
27  
28  
29  
30  
31  
32  
33  
34  
35  
36  
37  
38  
39  
40  
41  
42  
43  
44  
45  
46  
47  
48  
49  
50  
51  
52  
53  
54  
55  
56  
57  
58  
59  
60

# BMJ Open

## Estimates of price and income elasticity in Greece: Greek debt crisis transforming cigarettes into a luxury good - an econometric approach

|                                 |                                                                                                                                                                                                                                                                                                                                                                                                                                        |
|---------------------------------|----------------------------------------------------------------------------------------------------------------------------------------------------------------------------------------------------------------------------------------------------------------------------------------------------------------------------------------------------------------------------------------------------------------------------------------|
| Journal:                        | <i>BMJ Open</i>                                                                                                                                                                                                                                                                                                                                                                                                                        |
| Manuscript ID:                  | bmjopen-2013-004748.R2                                                                                                                                                                                                                                                                                                                                                                                                                 |
| Article Type:                   | Research                                                                                                                                                                                                                                                                                                                                                                                                                               |
| Date Submitted by the Author:   | 30-Jul-2014                                                                                                                                                                                                                                                                                                                                                                                                                            |
| Complete List of Authors:       | Tarantilis, Filippos; National School of Public Health, Department of Health Economics<br>Athanasakis, Kostas; National School of Public Health, Department of Health Economics<br>Zavras, Dimitris; National School of Public Health, Department of Health Economics<br>Vozikis, Athanasios; University of Piraeus, Department of Economics<br>Kyriopoulos, Ioannis; National School of Public Health, Department of Health Economics |
| <b>Primary Subject Heading</b>: | Health economics                                                                                                                                                                                                                                                                                                                                                                                                                       |
| Secondary Subject Heading:      | Health economics, Health policy, Smoking and tobacco                                                                                                                                                                                                                                                                                                                                                                                   |
| Keywords:                       | HEALTH ECONOMICS, Health economics < HEALTH SERVICES ADMINISTRATION & MANAGEMENT, Health policy < HEALTH SERVICES ADMINISTRATION & MANAGEMENT                                                                                                                                                                                                                                                                                          |
|                                 |                                                                                                                                                                                                                                                                                                                                                                                                                                        |

SCHOLARONE™  
Manuscripts



1  
2  
3 **Estimates of price and income elasticity in Greece:**  
4

5 **Greek debt crisis transforming cigarettes into a luxury good - an econometric approach**  
6

7  
8 Tarantilis F<sup>1</sup>, Athanasakis K<sup>1</sup>, Zavras D<sup>1</sup>, Vozikis A<sup>2</sup>, Kyriopoulos I<sup>1</sup>  
9

10  
11 <sup>1</sup>National School of Public Health, Athens, Greece  
12

13  
14 <sup>2</sup>Department of Economics, University of Piraeus, Athens, Greece  
15

16  
17 Corresponding author: Filippos Tarantilis, Department of Health Economics, National School  
18 of Public Health, 196 Alexandras Av., Athens, 11521, Greece, [fil\\_t@hotmail.com](mailto:fil_t@hotmail.com), Phone No:  
19 00302132010242, Fax No: 00302106449571  
20  
21  
22

23  
24 Kostas Athanasakis, National School of Public Health, Department of Health Economics,  
25 Athens, Greece  
26  
27

28  
29 Dimitris Zavras, National School of Public Health, Department of Health Economics, Athens,  
30 Greece  
31  
32

33  
34 Athanassios Vozikis, University of Piraeus, Department of Economics, Athens, Greece  
35

36  
37 Ioannis Kyriopoulos, National School of Public Health, Department of Health Economics,  
38 Athens, Greece  
39  
40

41  
42 Keywords: smoking, taxation, price elasticity, income elasticity  
43  
44

45  
46 Word count: 2,909 (without abstract, article summary, headings, tables, contributorship  
47 statement, acknowledgements, funding, competing interests and data sharing)  
48  
49  
50  
51  
52  
53  
54  
55  
56  
57  
58  
59  
60

## **Abstract**

**Objective:** During the past decades, smoking prevalence in Greece was estimated near or over 40%. Following a sharp fall in newest data on cigarette consumption, our objective is to assess smokers' sensitivity to cigarette price and consumer income changes as well as to project health benefits of an additional tax increase.

**Methods:** Cigarette consumption was considered as the dependent variable, with Weighted Average Price as a proxy for cigarette price, GDP as a proxy for consumers' income and dummy variables reflecting smoking restrictions and antismoking campaigns. Values were computed to natural logarithms and regression was performed. Then, 4 scenarios of tax increase were distinguished in order to calculate potential health benefits.

**Results:** Short-run price elasticity is estimated at -0.441 and short-run income elasticity is estimated at 1.040. Antismoking campaigns were found to have a statistically significant impact on consumption. Results indicate that, depending on the level of tax increase, annual per capita consumption could fall by at least 209.83 cigarettes; tax revenue could rise up by more than €0.74 billion, while smokers could be reduced by up to 530,568 and at least 465 smoking related deaths could be averted.

**Conclusions:** Price elasticity estimates are similar to previous studies in Greece, while income elasticity estimates are far greater. With cigarettes regarded as a luxury good, a great opportunity is presented for decision-makers to counter smoking. Increased taxation, along with focused antismoking campaigns, law reinforcement (to ensure compliance with smoking bans) and intensive control for smuggling could invoke a massive blow to the tobacco epidemic in Greece.

1  
2  
3 **Strengths and limitations of this study**  
4  
5

- 6 • The article offers information to policy makers regarding price elasticity, a key  
7  
8 measure to perform tobacco control policy  
9
- 10 • The article reports, for the first time, an income elasticity above 1, as evidence that  
11  
12 cigarettes tend to be considered a luxury good in Greece  
13
- 14 • The analysis treats qualitative variables and projects health and financial benefits  
15  
16 under extreme austerity  
17
- 18 • The analysis could not include dynamic (addiction) models, as no statistical  
19  
20 significance was reported  
21  
22  
23  
24  
25  
26  
27  
28  
29  
30  
31  
32  
33  
34  
35  
36  
37  
38  
39  
40  
41  
42  
43  
44  
45  
46  
47  
48  
49  
50  
51  
52  
53  
54  
55  
56  
57  
58  
59  
60

## Introduction

### Country Profile

Globally, more than 5 million people die every year from tobacco use, while tobacco use is the second leading cause of death, representing the 8.7% of global annual mortality .[1] As global tobacco consumption in 2009 was estimated at 5884 billion cigarettes,[2] tobacco clearly reflects the global transition from traditional risks such as undernutrition, unsafe sex, unsafe water, poor sanitation and hygiene to modern risks like physical inactivity, behavior risks and air quality.[1] In Greece, WHO estimations attribute 17% of mortality for people aged 30 or more to smoking.[3] Death rate attributed to tobacco and the proportion of deaths attributable to tobacco for ages 30 and over is documented in the following table (Table 1).

Table 1: Estimated death rated (per 100.000) and proportion attributable to tobacco for ages 30 and over, 2004 in Greece [3]

| Cause of death               | Death rate attributed to tobacco | Proportion of deaths attributable to tobacco |
|------------------------------|----------------------------------|----------------------------------------------|
| Lower respiratory infections | 3                                | 23%                                          |
| Malignant neoplasms          | 110                              | 29%                                          |
| Carciovascular diseases      | 90                               | 12%                                          |
| Respiratoty diseases         | 23                               | 37%                                          |

Little less than half Greek citizens (41%) are smokers.[4] Youth smoking is also high, 11.3% for young men and 9% for young women.[2] Environmental Tobacco Smoke (ETS) also represents a serious problem in Greece, as documented by previous research.[5]

Concerning cigarette affordability, findings suggest that Greece is one of the few high-income European Union countries with relatively low cigarette prices.[6] Low prices can be

1  
2  
3 recognized as a factor for the tobacco epidemic in Greece.[7] According to own calculations,  
4  
5 for the period 1992-2012, cigarette affordability, defined as the percentage of income  
6  
7 needed to purchase 100 packs of cigarettes, was estimated from 0.56% to 1.98%.  
8  
9

10 The first organized efforts to counter smoking in Greece were observed during 1979-1982.  
11  
12 At the moment, in Greece, tobacco advertising bans are complete, except for point-of-sale  
13  
14 advertising.  
15

16  
17 Tax revenue from tobacco products is arguably very important for the economic policy. In  
18  
19 1990, tax revenue accounted for 4.4% of GDP.[8] For the period 1998-2010 tobacco tax  
20  
21 revenue stood for an annual average 2% of GDP, but it seems to follow a downwards trend.  
22  
23

24 Official estimates measure the total annual direct cost of smoking a €2.14 billion, in an  
25  
26 environment where debt crisis and austerity measures set serious constraints to the health  
27  
28 system and resources should, now more than ever, be allocated properly. [9] Tobacco's  
29  
30 unfavorable consequences on the poor could become a factor, where unemployment rates  
31  
32 are estimated at 27.1% for the 2<sup>nd</sup> quarter of 2013, continuing to grow from under 900,000  
33  
34 to approximately 1,350,000 people in the last 24 months.[10] Moreover, 31% of the total  
35  
36 population is at risk of poverty or social exclusion.[11]  
37  
38

#### 39 40 41 Tobacco Market and government interventions

42  
43 Three market failures differentiate an individual's choice to smoke compared to the decision  
44  
45 to consume other goods: information failure on the health hazard of smoking, information  
46  
47 failure on the addiction caused by smoking and external burden to non-smokers.[12]  
48

49 Therefore, government intervention is justified in order both to protect smokers from the  
50  
51 perilous habit and correct for externalities associated to smoking. From a basic economics'  
52  
53 standpoint, it can be claimed that smoking's immense social burden overtakes the loss of  
54  
55 consumer's utility or else the loss of economic efficiency (deadweight loss).  
56  
57  
58  
59  
60

1  
2  
3 Tobacco taxation is imposed through a variety of structures but, in nearly all cases, includes  
4 two main types of tax: Ad valorem tax, which represents a percentage of price and specific  
5 tax, which is a fixed tax per cigarette. In Greece, following the 2010 restructure of tobacco  
6 tax, total tax represents 86% of the retail price, significantly increased compared to the 2009  
7 level and 2008 level when is represented 83% and 70% of the retail price respectively (WHO,  
8 2011). In 2012, specific excise tax was regulated at €80 per 1,000 cigarettes and ad valorem  
9 tax at 20% of the retail price. Their minimum sum is required to be no less than €115 per  
10 1,000 cigarettes. Meanwhile, a specific excise tax was set at €153 per kg of hand-rolled  
11 tobacco. Sales tax for cigarettes is fixed at 23% of the retail price.  
12  
13

14 Price increases should not be regarded the only way to reduce consumption, as the impact  
15 of income, advertising and health education are also important.[13] Manipulating these  
16 variables will result to reduced consumption and eventually reduced mortality and  
17 morbidity. Tobacco control programs and policies are found to be either cost-saving or cost-  
18 effective, compared to other public health interventions such as cardiovascular risk  
19 counseling and cancer screening.[14] Research on the impact of tobacco control showed  
20 that during 1981-2000, increases in tobacco control program expenditures in the U.S.A. lead  
21 to reduced cigarettes sales. Authors also suggest that expenditures have an even stronger  
22 lagged influence on sales.[15] Smoking bans are adopted in order to limit exposure to smoke  
23 but also cause a remarkable decrease in cigarette consumption, as smokers' opportunities to  
24 smoke are lessened.[16] In Greece, the effort to restrict smoking in public places through  
25 legislation has failed due to low compliance with law.[17] Youth exposed to secondhand  
26 smoke at home are estimated at 89.8% of total youth population.[2] Public education  
27 campaigns, if "hard-hitting, sophisticated and sustained", can be extremely effective.[18]  
28  
29  
30  
31  
32  
33  
34  
35  
36  
37  
38  
39  
40  
41  
42  
43  
44  
45  
46  
47  
48  
49  
50  
51  
52  
53  
54  
55  
56  
57  
58  
59  
60

### Price and income elasticity

The term used to measure the impact of a change in price on consumption is price elasticity of demand, defined as the percentage change in consumption that results from 1 percent increase in price.[19] Similarly, the impact of a change in income on consumption is measured by income elasticity, defined as the percentage change in consumption resulting from 1 percent increase in income. Estimating elasticity is crucial to policy makers in order not only to anticipate an intervention's impact both on tobacco consumption and tobacco tax revenue. If the proportionate fall in tobacco consumption exceeds the proportionate increase of tax, revenue will fall. Otherwise, revenue will rise.[16]

Results from a meta-analysis,[20] indicate that short run elasticity (-0.40) is lower than long run elasticity (-0.44), while in studies that included smuggling demand was less sensitive (-0.36). These findings confirm the general notion that a 10% increase in price would lead to a 4% reduction in consumption in high-income countries.[18] Stavrinou estimated the short run price elasticity at -0.079 and the long run at -0.147, while income elasticity is estimated at 0.18 and 0.33, respectively.[21] Hondroyannis and Papapetrou, based on data over the period 1967-1990, calculated the short run price elasticity at -0.33 and the long run at -0.6, while income elasticity estimations are 0.35 and 0.54, respectively. The fact that demand is inelastic is explained by the authors through addiction and the absence of direct substitutes. Furthermore, it is claimed that health warnings are more effective in reducing consumption than price increases.[9] Raptou and colleagues conclude in an income elasticity of 0.28, consisting of initiation elasticity (0.21) and consumption elasticity (0.07), arguing that income is a more important determinant for initiation rather than consumption. Furthermore, smoking bans are illustrated as a factor discouraging tobacco consumption.[22] Nikolaou and Velentzas, based on data from 1960 to 1995, estimated the short run price elasticity at -0.24 and the long run at -0.48, while income elasticity is

1  
2  
3 estimated at 0.19 and 0.40, respectively. Advertising had a positive but non-significant effect  
4 on demand and antismoking campaigns had a negative but non-significant effect on  
5 demand.[23] On the other hand, health warnings on packs during 1987-1990 had a  
6 significant negative impact on demand, lowering consumption by 4.2%. Dritsakis notes that  
7 consumption is a negative function of price and health education expenditure and a positive  
8 function of income as well.[24]  
9

10  
11  
12 As illustrated, there are no studies of price elasticity available for at least a decade. In the  
13 light of the above, the purpose of the present study was to investigate cigarette demand in  
14 Greece.  
15  
16

### 17 **Method**

18  
19 The tobacco product used in analysis is cigarettes, widely accepted as the major tobacco  
20 product. In order to account for population growth, annual consumption per person over 15  
21 was preferred to aggregate annual consumption. The threshold age was set at 15, as youth  
22 smoking in Greece is considered substantial. Data on annual cigarette consumption are  
23 available from 1994 onwards (1994-2012) from the Greek Ministry of Finance.  
24  
25

26  
27 As excise tax data were not available and MPPC (Most Popular Price Category) shows  
28 inconsistency due to pricing policy, the measure chosen to reflect price was the Weighted  
29 Average Price. Each pack consists of 20 cigarettes. The proxy used to deflate nominal into  
30 real prices was calculated by comparing real and nominal values of GDP (Gross Domestic  
31 Product) derived from World Bank. CPI (Consumer Price Index) was not selected as a proxy  
32 due to a change in calculations by Hellenic Statistical Authority in 1995, when General  
33 Harmonized Consumer Price Index was introduced. The base year set was 2005. Disposable  
34 income data were based at GDP. Again, the threshold age was set at 15. Deflation was not  
35 needed in that case, as real values were available. The base year set was 2005. Prior to 2008,  
36  
37  
38  
39  
40  
41  
42  
43  
44  
45  
46  
47  
48  
49  
50  
51  
52  
53  
54  
55  
56  
57  
58  
59  
60



national informative campaigns were not run in Greece at a national level. We considered The National Action Plan for Cancer (2008) as an anti-smoking campaign. A dummy variable was used to measure its influence on consumption. Expenditure on tobacco control was not available. Regulation for smoking bans and restrictions was only introduced in 2002 and amended in 2010. In order to measure its influence on consumption, an adjusted version of a previous reliable index was constructed, accounting not only for intensity of smoking restrictions but for compliance as well.[25] Values attributed were between 0 (no restrictions) to 1 (total ban) escalating by 0.25.

Data were analyzed with the statistical software packages SPSS® 20 and STATA® 9. The functional form used in the analysis was Double-log and values were transformed to natural logarithms in order to increase reliability. The models of demand were specified as follows.

*Conventional Demand Model*

$$\ln Q_t = b_0 + b_1 \ln P_t + b_2 \ln Y_t + b_3 SR_t + b_4 AsC_t + \varepsilon_t$$

*Myopic Addiction Model*

$$\ln Q_t = b_0 + b_1 \ln P_t + b_2 \ln Y_t + b_3 SR_t + b_4 AsC_t + b_5 \ln Q_{t-1} + \varepsilon_t$$

*Rational Addiction Model*

$$\ln Q_t = b_0 + b_1 \ln P_t + b_2 \ln Y_t + b_3 SR_t + b_4 AsC_t + b_5 \ln Q_{t-1} + b_6 \ln Q_{t+1} + \varepsilon_t$$

Where,

$Q_t$  : consumption of cigarettes per person over 15 (000 cigarettes) in year t

$Q_{t-1}$  : consumption of cigarettes per person over 15(000 cigarettes) in year t-1

$Q_{t+1}$  : consumption of cigarettes per person over 15(000 cigarettes) in year t+1

$P_t$  : real retail price per pack of 20 cigarettes in year t

$Y_t$ : real per person over 15 disposable income (€000) in year t

$b_0$ : intercept in year t

$SR_t$ : index of smoking restrictions or bans according to law in year t

$AsC_t$ : dichotomous index reflecting the existence of an anti-smoking campaign each year t

$\varepsilon_t$ : the error term

## **Results**

Through the conventional model of demand, the demand equation was estimated as follows

(Table 2):

Table 2: Conventional model of demand equation

|                                                                                                                                |                 |                      |
|--------------------------------------------------------------------------------------------------------------------------------|-----------------|----------------------|
| $\ln Q_t = -1.757 - 0.441 \cdot \ln P_t + 1.040 \cdot \ln Y_t - 0.132 \cdot AsC_t$                                             |                 |                      |
| F-statistic: 27.765                                                                                                            | R square: 0.847 | Durbin-Watson: 1.980 |
| Skewness/Kurtosis tests for Normality: adj $\chi^2 = 5.10$ , Prob> $\chi^2 = 0.0780$                                           |                 |                      |
| Breusch-Pagan / Cook-Weisberg test for heteroskedasticity: $\chi^2 = 2.56$ , Prob> $\chi^2 = 0.1093$                           |                 |                      |
| Dickey-Fuller test for unit root: Z(t)= -2.364, 1% critical value=-2.660, 5% critical value= -1.950, 10% critical value=-1.600 |                 |                      |

A regression analysis was performed and calculations were made stepwise. The variable created to capture the effect of smoking restrictions was found non-significant (p value asymptotically equal to 0.303 at 5% confidence level); thus, it is excluded from the model. P value at 5% confidence level is asymptotically equal to 0 for  $\ln Y_t$ , equal to 0.001 for  $\ln P_t$  and equal to 0.021 for  $AsC_t$ . The F-statistic is high, showing a good level of fit, while the model explains a great part of the variation. The Durbin-Watson statistic is close to 2, suggesting that the model has no autocorrelation. The Variation Inflated Factor is low for all variables, implying that multicollinearity is a non-factor. As evidenced by normality tests, standardized

1  
2  
3 residuals follow a normal distribution. Breusch-Pagan / Cook-Weisberg tests indicate that  
4  
5 residuals are homoscedastic. The Augmented Dickey-Fuller test for standardized residuals  
6  
7 confirms that there exist no unit roots. Therefore, the standardized residuals are stationary,  
8  
9 so the variables of the model are cointegrated (without constant and trend) and the  
10  
11 regression is not spurious. In the light of the above, we accept a short-run price elasticity of  
12  
13 demand at 0.441 and a short-run income elasticity of demand at 1.040.  
14  
15

16  
17 Through the myopic addiction model, the additional variable ( $\ln Q_{t-1}$ ) shows no statistical  
18  
19 significance. Therefore the model remains unchanged. Through the rational addiction  
20  
21 model, only the variable representing following year's consumption ( $\ln Q_{t+1}$ ) is found  
22  
23 significant (p value asymptotically equal to 0), with substantially lower levels of fit (R  
24  
25 square). Thus, we conclude that addiction models fail to offer additional information on how  
26  
27 consumption is influenced. Based on 2010 data, nominal tax revenue per pack is calculated  
28  
29 at €2.78, a value verifying and corresponding to the fixed amount of tax (86% of the nominal  
30  
31 retail price). We assume that the state maintains the existing ability to collect tribute.  
32  
33 Government proclamations suggest that tobacco will be further taxed. Therefore, we  
34  
35 distinct four scenarios, all with retail price increases, as anticipated, and each suggesting an  
36  
37 additional price increase by €0.5. Calculations are made only for the following year and  
38  
39 accordingly only short run elasticity is taken into account. Scenarios capture the impact of  
40  
41 the continuing fall in income at a rate of 4.8%. Based on Ross et al methodology and data  
42  
43 concerning tobacco-related mortality in Greece (Lower respiratory infections, Malignant  
44  
45 neoplasms, Cardiovascular diseases and Respiratory diseases), we estimate reduction on  
46  
47 smokers and mortality averted.[3,26]  
48  
49  
50

51  
52 In all four scenarios, consumption is decreased substantially while tax revenue is still  
53  
54 increased thanks to the inelastic demand. Moreover, smokers are significantly reduced and  
55  
56 smoking related deaths are accordingly limited (Table 3).  
57  
58  
59  
60

Table 3: Impact of price increase and income constraints on consumption, tax revenue, number of smokers and smoking related deaths

| Model scenarios                            | Scenario 1 | Scenario 2 | Scenario 3 | Scenario 4 |       |
|--------------------------------------------|------------|------------|------------|------------|-------|
| Price per pack                             | €4.47      | €4.97      | €5.47      | €5.97      |       |
| Percent increase of price                  | 12.59%     | 25.19%     | 37.78%     | 50.38%     |       |
| Fall in consumption due to price increase  | -5.55%     | -11.11%    | -16.66%    | -22.22%    |       |
| Fall in consumption due to income decrease | -4.99%     | -4.99%     | -4.99%     | -4.99%     |       |
| Per capita consumption level               | 1,779.84   | 1,669.33   | 1,558.82   | 1,448.31   |       |
| Per capita consumption deterred            | 209.83     | 320.34     | 430.85     | 541.36     |       |
| Tax revenue per pack                       | €3.84      | €4.27      | €4.70      | €5.13      |       |
| Tax revenue per cigarette                  | €0.192     | €0.214     | €0.235     | €0.257     |       |
| Total tax revenue (€ billion)              | €3,336     | €3,478     | €3,575     | €3,625     |       |
| Incremental tax revenue (€ billion)        | €0,455     | €0,597     | €0,694     | €0,744     |       |
| Reduction in number of smokers             | 205,650    | 313,956    | 422,262    | 530,568    |       |
| Smoking related deaths averted             | high(0,50) | 930        | 1,420      | 1,911      | 2,401 |
|                                            | low(0,25)  | 465        | 710        | 955        | 1,200 |

*-Differences in calculations may occur due to rounding*

*-Impact of price increase shared between prevalence and consumption*

*-High estimate indicates that 50% of smokers' deaths are attributable to tobacco use, whereas low estimate indicates that 25% of smokers' deaths are attributable to tobacco use*

### Discussion

Price elasticity estimates are greater than previous research in Greece,[8, 23-24] but consistent with findings by Gallet and List.[20] Estimates for income elasticity are far greater than estimates provided by literature in Greece.[8, 21-23] Regarding antismoking campaigns, results are in agreement with previous testimony.[23-24] Smoking restrictions show no statistical significance, confirming the claims by Joosens and Raw that compliance is low.[17] Finally, results are in general agreement with Alpert et al,[27] though a different methodology is followed.

Paired with the still high cigarette affordability, as documented in the current study and reported by previous research,[6] the nature of demand in Greece presents a vast opportunity for the policy makers to counter the tobacco epidemic and ensure revenue and cash flows at the same time. Even supposing that other determinants of demand, such as income, which is anticipated to fall, do not change, tobacco taxation proves to be a powerful tool. Annual consumption per person over 15 would be no higher than 1,780 cigarettes, even in the worst case (scenario1) and may fall to less than 1,448 cigarettes. On the other hand, tax revenue would recover from the downwards trend, accounting again for more than 1.80% of GDP, even in scenario1. In absolute values, excess tobacco tax revenue could rejuvenate the dismantled public coffers. Results suggest that even with a modest 10% of tax revenue allocated to offsetting the tobacco epidemic, there would be more than enough disposable funds towards planning, implementing, evaluating and improving antismoking efforts. Greeks seem to be in agreement with heavy taxation on cigarettes, but only if respective revenue is attributed to tobacco control.[28] In terms of public health benefits, smokers could be reduced by nearly 530,568 people, while up to 2,401 smoking related deaths could be averted on an annual basis. Nonetheless, findings should be treated with caution and increases in price should not be excessively increased from day one, as the

1  
2  
3 smokers' reaction is not easy to predict with confidence intervals widened. A stepwise  
4  
5 increase of tax would eliminate many of the risks associated with a sharp and sudden  
6  
7 increase in cigarette prices. Besides, Greece already performs better in tax collection than  
8  
9 countries such as Germany, France and Slovenia among others,[26] as the excise per smoker  
10  
11 ratio indicates, with €738.71 collected for every smoker.  
12

13  
14 Income sensitivity is larger than in any previous study either in Greece or internationally.  
15  
16 Thus, it is not exaggerating to argue that Greek smokers are shocked by the constraint on  
17  
18 their income. Besides, it is the first time in at least 40 years that income in Greece is falling at  
19  
20 this rate. The austerity measures should be viewed as a shift event in cigarette consumption,  
21  
22 among others.  
23

24  
25 Reducing the toll of tobacco in Greece is not an easy task. Decisions should include fostering  
26  
27 an antismoking-culture through well-planned national antismoking campaigns, raising the  
28  
29 cigarettes prices at an initial level no less than €4 a pack and ensuring compliance with the  
30  
31 anti-smoking law, especially on the current occasion, when City Police (the main mechanism  
32  
33 of control on the matter) was recently abolished as an institution. Controlling illicit trade is  
34  
35 crucial to maximize the effect of interventions.  
36  
37

38  
39 As regards to the limitations of this study, it must be noted that addictions models were  
40  
41 unable to provide statistically significant information, possibly due to the inclusion of 2012  
42  
43 data in the time series. Possible future analysis of an even wider time series could provide  
44  
45 even more reliable results, as multicollinearity could be fully cured. Furthermore, the study  
46  
47 could be strengthened by employing statistical tests on more observations, regarding the  
48  
49 endogeneity of cigarette prices. Moreover, the current study is based on the most popular  
50  
51 price category in order to estimate the impact of prices changes on cigarette demand. It is  
52  
53 possible that a weighted average for all the brands sold in Greece could eliminate  
54  
55 unilateralism on prices data. Still, the anticipated but not fully documented switch of Greek  
56  
57  
58  
59  
60

1  
2  
3 smokers from manufactured cigarettes to hand-rolled tobacco should be taken into account  
4  
5 in any future research. Yet, if the increase of contraband cigarettes in the Greek market  
6  
7 could be quantified, results would be more punctual. In addition, tobacco shows synergistic  
8  
9 effect with other substances, such as alcohol. Thus, it would be meaningful to investigate  
10  
11 the combined effect of tobacco and alcohol from an economic aspect. Finally, researchers  
12  
13 argue that the increased availability of nicotine substitutes will reduce demand for tobacco  
14  
15 products and increase the price sensitivity as well.[19] Under that scope, if research included  
16  
17 nicotine substitutes, accuracy would be improved.  
18  
19  
20  
21  
22  
23  
24  
25  
26  
27  
28  
29  
30  
31  
32  
33  
34  
35  
36  
37  
38  
39  
40  
41  
42  
43  
44  
45  
46  
47  
48  
49  
50  
51  
52  
53  
54  
55  
56  
57  
58  
59  
60

1  
2  
3 **Acknowledgements:** We would like to express our gratitude to Professor Frank Chaloupka  
4  
5 for his valuable and constructive suggestions towards planning and development of this  
6  
7 research work. His willingness to provide us his limited time has been very much  
8  
9 appreciated.  
10

11  
12 **Contributorship Statement:** FT, DZ and AV performed the calculations and analyses  
13  
14 reported in the text. FT and KA reviewed the literature for relevant data and documentation.  
15  
16 FT and KA drafted the manuscript which was edited and critically revised by KA, AV and JK.  
17  
18

19  
20 **Funding:** This research received no specific grant from any funding agency in the public,  
21  
22 commercial or not-for-profit sectors.  
23

24  
25 **Competing interests:** None.  
26

27  
28 **Data Sharing:** E Inputs of the analysis include aggregate cigarette consumption, population,  
29  
30 price and Gross Domestic Product. Moreover, dummy variables of the analysis are based on  
31  
32 the Greek National Plan against Cancer (<http://www.epaac.eu/national-cancer-plans>) and  
33  
34 the Greek legislation [Law 3730/2008, effective from 23/12/2008 onwards and Law  
35  
36 3868/2010, effective from 03/08/2010 onwards, both available at Government Gazettes  
37  
38 (<http://www.et.gr/>)]. Unfortunately, aggregate cigarette consumption and weighted average  
39  
40 price for the period 1994-2012 are official but remain unpublished by the Greek Ministry of  
41  
42 Finance. Therefore, they are available upon request from the lead author (Filippos Tarantilis,  
43  
44 [fil\\_t@hotmail.com](mailto:fil_t@hotmail.com)). Due to the Ministry's often changing policy in terms of providing  
45  
46 information to the public, we rejected the option to share data in Dryad data repository.  
47  
48 Finally, Greek population and Gross Domestic Product for the arementioned period derived  
49  
50 from the World Bank database (<http://data.worldbank.org/>). No additional data were used.  
51  
52 Thus no additional data are available.  
53  
54  
55  
56  
57  
58  
59  
60



1  
2  
3  
4  
5  
6  
7  
8  
9  
10  
11  
12  
13  
14  
15  
16  
17  
18  
19  
20  
21  
22  
23  
24  
25  
26  
27  
28  
29  
30  
31  
32  
33  
34  
35  
36  
37  
38  
39  
40  
41  
42  
43  
44  
45  
46  
47  
48  
49  
50  
51  
52  
53  
54  
55  
56  
57  
58  
59  
60

For peer review only

## References

1. WHO. Global Health Risks: Mortality and burden of disease attributable to selected major risks. Geneva: World Health Organization 2009  
[http://www.who.int/healthinfo/global\\_burden\\_disease/GlobalHealthRisks\\_report\\_full.pdf](http://www.who.int/healthinfo/global_burden_disease/GlobalHealthRisks_report_full.pdf) (Accessed 14 Nov 2011).
2. Eriksen M, Mackay J, Ross H. The Tobacco Atlas. Fourth Ed. Atlanta, GA, American Cancer Society, New York: World Lung Foundation 2012.
3. WHO. WHO Global report: Mortality Attributable to Tobacco. Geneva: World Health Organization 2012  
[http://whqlibdoc.who.int/publications/2012/9789241564434\\_eng.pdf](http://whqlibdoc.who.int/publications/2012/9789241564434_eng.pdf) (Accessed 5 Oct 2012).
4. Filippidis FT, Vardavas CI, Loukopoulou A et al. Prevalence and determinants of tobacco use among adults in Greece: 4 year trends. Eur J Public Health 2013;23(5):772-776.
5. Vardavas CI, Kondilis B, Travers MJ et al. Environmental tobacco smoke in hospitality venues in Greece. BMC Public Health 2007;7(1):302.
6. Blecher EH, Van Walbeek CP. Cigarette affordability trends: an update and some methodological comments. Tobacco Control 2009;18(3):167-175.
7. Vardavas CI, Kafatos AG. Smoking policy and prevalence in Greece: an overview. The European Journal of Public Health 2007;17(2):211-213.
8. Hondroyannis G, Papapetrou E. Cigarette consumption in Greece: empirical evidence from cointegration analysis. Applied Economics Letters 1997;4:571-574
9. Ministry of Health and Social Solidarity. The Greek National Plan of Action against Cancer 2008-2012, Athens, 2008. [http://ygeiamap.gov.gr/wp-content/uploads/2013/05/karkinos\\_teliko.pdf](http://ygeiamap.gov.gr/wp-content/uploads/2013/05/karkinos_teliko.pdf) (Accessed 5 Oct 2011)
10. Hellenic Statistical Authority, Workforce research, Press release 19 September 2013,

1  
2  
3 <http://www.statistics.gr/portal/page/portal/ESYE/BUCKET/A0101/PressReleases/A0>  
4  
5 [101\\_SJO01\\_DT\\_QQ\\_02\\_2013\\_01\\_F\\_GR.pdf](http://www.statistics.gr/portal/page/portal/ESYE/BUCKET/A0101/PressReleases/A0101_SJO01_DT_QQ_02_2013_01_F_GR.pdf) (Accessed 7 November 2013)  
6

- 7  
8 11. Eurostat news release 26 February 2013, Eurostat press office  
9  
10 [http://europa.eu/rapid/press-release\\_STAT-13-28\\_en.htm](http://europa.eu/rapid/press-release_STAT-13-28_en.htm) (Accessed 27 February  
11  
12 2013)
- 13  
14 12. Wilkins N, Yurekli A, Hu TW. Economic analysis of tobacco demand. Economics of  
15  
16 Tobacco Toolkit. Washington: World Bank 2004  
17  
18 <http://siteresources.worldbank.org/INTPH/Resources/3Demand.pdf> (Accessed 24  
19  
20 Nov 2011)
- 21  
22 13. Godfrey C, Maynard A. Economic aspects of tobacco use and taxation policy. BMJ  
23  
24 1998;297(6644):339–343.
- 25  
26 14. Kahende JW, Loomis BR, Adhikari B, Marshall L. A review of economic evaluations of  
27  
28 tobacco control programs. Int J Environ Res Public Health 2009;6(1):51-68.
- 29  
30 15. Farrelly M, Bray J. Responses to cigarette tax increases by race/ethnicity, income  
31  
32 and age groups – United States, 1976–1993. Journal of the American Medical  
33  
34 Association 1999;280:1979-1980.
- 35  
36 16. Chaloupka F, Warner E. The economics of smoking. Handbook of Health Economics,  
37  
38 2000;1:1539-1627.
- 39  
40 17. Joossens L, Raw M. The tobacco control scale 2010 in Europe. Brussels: Association  
41  
42 of European Cancer Leagues 2011.
- 43  
44 18. WHO. Report on the Global Tobacco Epidemic, 2008: The MPOWER package.  
45  
46 Geneva: World Health Organization 2008  
47  
48 [http://www.who.int/tobacco/mpower/mpower\\_report\\_full\\_2008.pdf](http://www.who.int/tobacco/mpower/mpower_report_full_2008.pdf) (Accessed 14  
49  
50 Nov 2011).  
51  
52  
53  
54  
55  
56  
57  
58  
59  
60

- 1  
2  
3 19. Chaloupka F, Pacula R. The impact of price on youth tobacco use. Changing  
4 Adolescent Smoking Prevalence: Where It Is and Why, Smoking and Tobacco Control  
5 Monograph 1999:14.  
6  
7  
8  
9  
10 20. Gallet C, List J. Cigarette demand: A meta-analysis of elasticities. Health Econ  
11 2003;12:821-835.  
12  
13  
14 21. Stavrinou VG. The effects of an anti-smoking campaign on cigarette consumption:  
15 empirical evidence from Greece. Applied Economics 1987;19:323-329.  
16  
17  
18 22. Raptou E, Mattas K, Tsakiridou E et al. Factors affecting cigarette  
19 demand. International Advances in Economic Research 2005;11(3):275-290.  
20  
21  
22 23. Nikolaou A, Velentzas K. Estimating the Demand for Cigarettes in Greece: An Error  
23 Correction Model, Agricultural Economics Review 2001;2(1):20-27.  
24  
25  
26 24. Dritsakis E. Forecasting of cigarettes consumption in Greece: An empirical  
27 investigation with cointegration analysis. Agricultural Economic Review  
28 2003;4(2):47-56.  
29  
30  
31 25. Wasserman J, Manning WG, Newhouse JP et al. The Effects of Excise Taxes and  
32 Regulations on Cigarette Smoking. Journal of Health Economics 1991;10(1):43-64.  
33  
34  
35 26. Ross HZ, Shariff S, Gilmore A. Economics of Tobacco Taxation in Russia. Paris:  
36 International Union Against Tuberculosis and Lung Disease 2008.  
37  
38  
39 27. Alpert HR, Vardavas CI, Chaloupka FJ et al. The recent and projected public health  
40 and economic benefits of cigarette taxation in Greece. Tobacco Control 2013 Mar 6.  
41 [Epub ahead of print]  
42  
43  
44 28. Vardavas CI, Filippidis FT, Agaku I et al. Tobacco taxation: the importance of  
45 earmarking the revenue to health care and tobacco control. Tobacco induced  
46 diseases 2012;10(1):21.  
47  
48  
49  
50  
51  
52  
53  
54  
55  
56  
57  
58  
59  
60

**Estimates of price and income elasticity in Greece:**

**Greek debt crisis transforming cigarettes into a luxury good - an econometric approach**

Tarantilis F<sup>1</sup>, Athanasakis K<sup>1</sup>, [Zavras D<sup>1</sup>](#), Vozikis A<sup>2</sup>, Kyriopoulos I<sup>1</sup>

<sup>1</sup>National School of Public Health, Athens, Greece

<sup>2</sup>Department of Economics, University of Piraeus, Athens, Greece

Corresponding author: Filippos Tarantilis, Department of Health Economics, National School of Public Health, 196 Alexandras Av., Athens, 11521, Greece, [fil\\_t@hotmail.com](mailto:fil_t@hotmail.com), Phone No: 00302132010242, Fax No: 00302106449571

Kostas Athanasakis, National School of Public Health, Department of Health Economics, Athens, Greece

[Dimitris Zavras, National School of Public Health, Department of Health Economics, Athens, Greece](#)

Athanassios Vozikis, University of Piraeus, Department of Economics, Athens, Greece

Ioannis Kyriopoulos, National School of Public Health, Department of Health Economics, Athens, Greece

Keywords: smoking, taxation, price elasticity, income elasticity

Word count: [3,0412,909 \(without abstract, article summary, headings, tables, contributorship statement, acknowledgements, funding, competing interests and data sharing\)](#)

**Abstract**

**Objective:** During the past decades, smoking prevalence in Greece was estimated near or over 40%. Following a sharp fall in newest data on cigarette consumption, our objective is to

Field Code Changed

1  
2  
3  
4  
5  
6 assess smokers' sensitivity to cigarette price and consumer income changes as well as to  
7 project health benefits of an additional tax increase.  
8

9  
10 **Methods:** Cigarette consumption was considered as the dependent variable, with Weighted  
11 Average Price as a proxy for cigarette price, GDP as a proxy for consumers' income and  
12 dummy variables reflecting smoking restrictions and antismoking campaigns. Values were  
13 computed to natural logarithms and regression was performed. Then, 4 scenarios of tax  
14 increase were distinguished in order to calculate potential health benefits.  
15  
16  
17  
18  
19

20  
21 **Results:** ~~Addiction models were unable to provide statistically significant information due to~~  
22 ~~a nearly 23.5% drop in consumption during 2012.~~ Short-run price elasticity is estimated at -  
23 0.441 and short-run income elasticity is estimated at 1.040. Antismoking campaigns were  
24 found to have a statistically significant impact on consumption. Results indicate that,  
25 depending on the level of tax increase, annual per capita consumption could fall by at least  
26 209.83 cigarettes; tax revenue could rise up by more than €0.74 billion, while smokers could  
27 be reduced by up to 530,568 and at least 465 smoking related deaths could be averted.  
28  
29  
30  
31  
32  
33

34  
35 **Conclusions:** Price elasticity estimates are similar to previous studies in Greece, while  
36 income elasticity estimates are far greater. With cigarettes regarded as a luxury good, a  
37 great opportunity is presented for decision-makers to counter smoking. Increased taxation,  
38 along with focused antismoking campaigns, law reinforcement (to ensure compliance with  
39 smoking bans) and intensive control for smuggling could invoke a massive blow to the  
40 tobacco epidemic in Greece.  
41  
42  
43  
44  
45

46  
47 **Article Summary** Strengths and limitations of this study  
48

- 49 • The article offers information to policy makers regarding price elasticity, a key  
50 measure to perform tobacco control policy  
51  
52  
53  
54  
55  
56  
57  
58  
59  
60

Formatted: Font: Not Bold, No underline

- The article reports, for the first time, an income elasticity above 1, as evidence that cigarettes tend to be considered a luxury good in Greece
- The analysis treats qualitative variables and projects health and financial benefits under extreme austerity
- The analysis could not include dynamic (addiction) models, as no statistical significance was reported

## Introduction

### Country Profile

Globally, more than 5 million people die every year from tobacco use, while tobacco use is the second leading cause of death, representing the 8.7% of global annual mortality .[1] As global tobacco consumption in 2009 was estimated at 5884 billion cigarettes,[2] tobacco clearly reflects the global transition from traditional risks such as undernutrition, unsafe sex, unsafe water, poor sanitation and hygiene to modern risks like physical inactivity, behavior risks and air quality.[1] In Greece, WHO estimations attribute 17% of mortality for people aged 30 or more to smoking.[3] Death rate attributed to tobacco and the proportion of deaths attributable to tobacco for ages 30 and over is documented in the following table (Table 1).

Table 1: Estimated death rated (per 100.000) and proportion attributable to tobacco for ages 30 and over, 2004 in Greece [3]

| Cause of death               | Death rate attributed to tobacco | Proportion of deaths attributable to tobacco |
|------------------------------|----------------------------------|----------------------------------------------|
| Lower respiratory infections | 3                                | 23%                                          |
| Malignant neoplasms          | 110                              | 29%                                          |
| Cardiovascular diseases      | 90                               | 12%                                          |
| Respiratory diseases         | 23                               | 37%                                          |

Little less than half Greek citizens (41%) are smokers.[4] Youth smoking is also high, 11.3% for young men and 9% for young women.[2] Environmental Tobacco Smoke (ETS) also represents a serious problem in Greece, as documented by previous research.[5]

Concerning cigarette affordability, findings suggest that Greece is one of the few high-income European Union countries with relatively low cigarette prices.[6] Low prices can be recognized as a factor for the tobacco epidemic in Greece.[7] According to own calculations,



1  
2  
3  
4  
5  
6 for the period 1992-2012, cigarette affordability, defined as the percentage of income  
7 needed to purchase 100 packs of cigarettes, was estimated from 0.56% to 1.98%.

8  
9  
10 The first organized efforts to counter smoking in Greece were observed during 1979-1982.  
11  
12 At the moment, in Greece, tobacco advertising bans are complete, except for point-of-sale  
13  
14 advertising.

15  
16  
17 Tax revenue from tobacco products is arguably very important for the economic policy. In  
18  
19 1990, tax revenue accounted for 4.4% of GDP.[8] For the period 1998-2010 tobacco tax  
20  
21 revenue stood for an annual average 2% of GDP, but it seems to follow a downwards trend.

22  
23  
24 Official estimates measure the total annual direct cost of smoking a €2.14 billion, in an  
25  
26 environment where debt crisis and austerity measures set serious constraints to the health  
27  
28 system and resources should, now more than ever, be allocated properly. [9] Tobacco's  
29  
30 unfavorable consequences on the poor could become a factor, where unemployment rates  
31  
32 are estimated at 27.1% for the 2<sup>nd</sup> quarter of 2013, continuing to grow from under 900,000  
33  
34 to approximately 1,350,000 people in the last 24 months.[10] Moreover, 31% of the total  
35  
36 population is at risk of poverty or social exclusion.[11]

### 37 38 Tobacco Market and government interventions

39  
40 Three market failures differentiate an individual's choice to smoke compared to the decision  
41  
42 to consume other goods: information failure on the health hazard of smoking, information  
43  
44 failure on the addiction caused by smoking and external burden to non-smokers.[12]

45  
46 Therefore, government intervention is justified in order both to protect smokers from the  
47  
48 perilous habit and correct for externalities associated to smoking. From a basic economics'  
49  
50 standpoint, it can be claimed that smoking's immense social burden overtakes the loss of  
51  
52 consumer's utility or else the loss of economic efficiency (deadweight loss). -A hypothetical  
53  
54  
55  
56  
57  
58  
59  
60

1  
2  
3  
4  
5  
6 example on how the deadweight loss emerges, after the introduction of tax, is illustrated in  
7  
8 figures (Figure 1 and Figure 2).  
9

10 Tobacco taxation is imposed through a variety of structures but, in nearly all cases, includes  
11 two main types of tax: Ad valorem tax, which represents a percentage of price and specific  
12 tax, which is a fixed tax per cigarette. In Greece, following the 2010 restructure of tobacco  
13 tax, total tax represents 86% of the retail price, significantly increased compared to the 2009  
14 level and 2008 level when is represented 83% and 70% of the retail price respectively (WHO,  
15 2011). In 2012, specific excise tax was regulated at €80 per 1,000 cigarettes and ad valorem  
16 tax at 20% of the retail price. Their minimum sum is required to be no less than €115 per  
17 1,000 cigarettes. Meanwhile, a specific excise tax was set at €153 per kg of hand-rolled  
18 tobacco. Sales tax for cigarettes is fixed at 23% of the retail price.  
19

20 Price increases should not be regarded the only way to reduce consumption, as the impact  
21 of income, advertising and health education are also important.[13] Manipulating these  
22 variables will result to reduced consumption and eventually reduced mortality and  
23 morbidity. Tobacco control programs and policies are found to be either cost-saving or cost-  
24 effective, compared to other public health interventions such as cardiovascular risk  
25 counseling and cancer screening.[14] Research on the impact of tobacco control showed  
26 that during 1981-2000, increases in tobacco control program expenditures in the U.S.A. lead  
27 to reduced cigarettes sales. Authors also suggest that expenditures have an even stronger  
28 lagged influence on sales.[15] Smoking bans are adopted in order to limit exposure to smoke  
29 but also cause a remarkable decrease in cigarette consumption, as smokers' opportunities to  
30 smoke are lessened.[16] In Greece, the effort to restrict smoking in public places through  
31 legislation has failed due to low compliance with law.[17] Youth exposed to secondhand  
32 smoke at home are estimated at 89.8% of total youth population.[2] Public education  
33 campaigns, if "hard-hitting, sophisticated and sustained", can be extremely effective.[18]  
34  
35  
36  
37  
38  
39  
40  
41  
42  
43  
44  
45  
46  
47  
48  
49  
50  
51  
52  
53  
54  
55  
56  
57  
58  
59  
60

### Price and income elasticities

The term used to measure the impact of a change in price on consumption is price elasticity of demand, defined as the percentage change in consumption that results from 1 percent increase in price.[19] Similarly, the impact of a change in income on consumption is measured by income elasticity, defined as the percentage change in consumption resulting from 1 percent increase in income. Estimating elasticity is crucial to policy makers in order not only to anticipate an intervention's impact both on tobacco consumption and tobacco tax revenue. If the proportionate fall in tobacco consumption exceeds the proportionate increase of tax, revenue will fall. Otherwise, revenue will rise.[16]

Results from a meta-analysis,[20] indicate that short run elasticity (-0.40) is lower than long run elasticity (-0.44), while in studies that included smuggling demand was less sensitive (-0.36). These findings confirm the general notion that a 10% increase in price would lead to a 4% reduction in consumption in high-income countries.[18] Stavrinou estimated the short run price elasticity at -0.079 and the long run at -0.147, while income elasticity is estimated at 0.18 and 0.33, respectively.[21] Hondroyannis and Papapetrou, based on data over the period 1967-1990, calculated the short run price elasticity at -0.33 and the long run at -0.6, while income elasticity estimations are 0.35 and 0.54, respectively. The fact that demand is inelastic is explained by the authors through addiction and the absence of direct substitutes. Furthermore, it is claimed that health warnings are more effective in reducing consumption than price increases.[9] Raptou and colleagues conclude in an income elasticity of 0.28, consisting of initiation elasticity (0.21) and consumption elasticity (0.07), arguing that income is a more important determinant for initiation rather than consumption. Furthermore, smoking bans are illustrated as a factor discouraging tobacco consumption.[22] Nikolaou and Velentzas, based on data from 1960 to 1995, estimated the short run price elasticity at -0.24 and the long run at -0.48, while income elasticity is

1  
2  
3  
4  
5  
6 estimated at 0.19 and 0.40, respectively. Advertising had a positive but non-significant effect  
7  
8 on demand and antismoking campaigns had a negative but non-significant effect on  
9  
10 demand.[23] On the other hand, health warnings on packs during 1987-1990 had a  
11  
12 significant negative impact on demand, lowering consumption by 4.2%. Dritsakis notes that  
13  
14 consumption is a negative function of price and health education expenditure and a positive  
15  
16 function of income as well.[24]

17  
18 As illustrated, there are no studies of price elasticity available for at least a decade. In the  
19  
20 light of the above, the purpose of the present study was to investigate cigarette demand in  
21  
22 Greece.

### 23 24 **Method**

25  
26 The tobacco product used in analysis is cigarettes, widely accepted as the major tobacco  
27  
28 product. In order to account for population growth, annual consumption per person over 15  
29  
30 was preferred to aggregate annual consumption. The threshold age was set at 15, as youth  
31  
32 smoking in Greece is considered substantial. Data on annual cigarette consumption are  
33  
34 available from 1994 onwards [\(1994-2012\) from the Greek Ministry of Finance](#).

35  
36  
37 ~~Monthly (and quarterly) data on the quantities of taxed cigarettes were available from 2007~~  
38  
39 ~~to 2011.~~ As excise tax data were not available and MPPC (Most Popular Price Category)  
40  
41 shows inconsistency due to pricing policy, the measure chosen to reflect price was the  
42  
43 Weighted Average Price. Each pack consists of 20 cigarettes. The proxy used to deflate  
44  
45 nominal into real prices was calculated by comparing real and nominal values of GDP (Gross  
46  
47 Domestic Product) derived from World Bank. CPI (Consumer Price Index) was not selected as  
48  
49 a proxy due to a change in calculations by Hellenic Statistical Authority in 1995, when  
50  
51 General Harmonized Consumer Price Index was introduced. The base year set was 2005.  
52  
53 Disposable income data were based at GDP. Again, the threshold age was set at 15.  
54  
55  
56  
57  
58  
59  
60

Deflation was not needed in that case, as real values were available. The base year set was 2005. Prior to 2008, national informative campaigns were not run in Greece at a national level. We considered The National Action Plan for Cancer (2008) as an anti-smoking campaign. A dummy variable was used to measure its influence on consumption. Expenditure on tobacco control was not available. Regulation for smoking bans and restrictions was only introduced in 2002 and amended in 2010. In order to measure its influence on consumption, an adjusted version of a previous reliable index was constructed, accounting not only for intensity of smoking restrictions but for compliance as well.[25] Values attributed were between 0 (no restrictions) to 1 (total ban) escalating by 0.25.

~~Regression analysis includes only a static model, as dynamic models (incorporating models) show limited statistical significance, due to the inclusion of 2012 data in the time series.~~

~~Data were analyzed with the statistical software packages SPSS® 20 and STATA® 9. The functional form used in the analysis was Double-log and values were transformed to natural logarithms in order to increase reliability. Testing for endogeneity of cigarette prices was not possible as the annual tax rates were only available from 2008 onwards. Time trend was found to be insignificant; therefore, it is excluded from the equations. The models of demand was/were specified as follows.~~

*Conventional Demand Model*

$$\ln Q_t = b_0 + b_1 \ln P_t + b_2 \ln Y_t + b_3 SR_t + b_4 ASC_t + \varepsilon_t$$

~~*Myopic Addiction Model*~~

~~$$\ln Q_t = b_0 + b_1 \ln P_t + b_2 \ln Y_t + b_3 SR_t + b_4 ASC_t + b_5 \ln Q_{t-1} + \varepsilon_t$$~~

~~*Rational Addiction Model*~~

~~$$\ln Q_t = b_0 + b_1 \ln P_t + b_2 \ln Y_t + b_3 SR_t + b_4 ASC_t + b_5 \ln Q_{t-1} + b_6 \ln Q_{t+1} + \varepsilon_t$$~~

Where,

Formatted: Font: Italic, English (U.S.)

Formatted: Underline, English (U.S.)

Formatted: Underline

Formatted: Underline, English (U.S.)

Formatted: Font: Italic, English (U.S.)

Formatted: Underline, English (U.S.)

Formatted: Underline

Formatted: Underline, English (U.S.)

1  
2  
3  
4  
5  
6  $Q_t$  : consumption of cigarettes per person over 15 (000 cigarettes) in year t  
7

8  
9  $Q_{t-1}$  : consumption of cigarettes per person over 15(000 cigarettes) in year t-1

Formatted: English (U.S.)

10  
11  $Q_{t+1}$  : consumption of cigarettes per person over 15(000 cigarettes) in year t+1

Formatted: English (U.S.)

Formatted: English (U.S.)

Formatted: English (U.S.)

Formatted: English (U.S.)

12  
13  $P_t$  : real retail price per pack of 20 cigarettes in year t  
14

15  
16  $Y_t$  : real per person over 15 disposable income (€000-€) in year t  
17

18  
19  $b_0$  : intercept in year t  
20

21  
22  $SR_t$  : index of smoking restrictions or bans according to law in year t  
23

24  
25  $AsC_t$  : dummy checking dichotomous index reflecting the existence of an anti-smoking  
26 campaign each year t  
27

28  
29  $\varepsilon_t$  : the error term  
30  
31  
32  
33  
34  
35  
36  
37  
38  
39  
40  
41  
42  
43  
44  
45  
46  
47  
48  
49  
50  
51  
52  
53  
54  
55  
56  
57  
58  
59  
60

## Results

Through the conventional model of demand, the demand equation was estimated as follows

(Table 2):

Table 2: Conventional model of demand equation

|                                                                                                                                      |                 |                      |
|--------------------------------------------------------------------------------------------------------------------------------------|-----------------|----------------------|
| $\ln Q_t = -1.757 - 0.441 \cdot \ln P_t + 1.040 \cdot \ln Y_t - 0.132 \cdot \text{AsC}_t$                                            |                 |                      |
| F-statistic: 27.765                                                                                                                  | R square: 0.847 | Durbin-Watson: 1.980 |
| Skewness/Kurtosis tests for Normality: adj chi <sup>2</sup> = 5.10, Prob>chi <sup>2</sup> = 0.0780                                   |                 |                      |
| Breusch-Pagan / Cook-Weisberg test for heteroskedasticity: chi <sup>2</sup> = 2.56, Prob>chi <sup>2</sup> = 0.1093                   |                 |                      |
| Dickey-Fuller test for unit root: Z(t) = -2.364, 1% critical value = -2.660, 5% critical value = -1.950, 10% critical value = -1.600 |                 |                      |

Formatted: Superscript

Formatted: Superscript

Formatted: English (U.S.)

A regression analysis was performed and calculations were made stepwise. The variable created to capture the effect of smoking restrictions was found non-significant (p value asymptotically equal to 0.303 at 5% confidence level); thus, it is excluded from the model. P value at 5% confidence level is asymptotically equal to 0 for  $\ln Y_t$ , equal to 0.001 for  $\ln P_t$  and equal to 0.021 for  $\text{AsC}_t$ . The F-statistic is high, showing a good level of fit, while the model explains a great part of the variation. The Durbin-Watson statistic is close to 2, suggesting that the model has no autocorrelation. The Variation Inflated Factor is low for all variables, implying that multicollinearity is a non-factor. As evidenced by normality tests, standardized residuals follow a normal distribution. Breusch-Pagan / Cook-Weisberg tests indicate that residuals are homoscedastic. The Augmented Dickey-Fuller test for standardized residuals confirms that there exist no unit roots. Therefore, the standardized residuals are stationary, so the variables of the model are cointegrated (without constant and trend) and the

1  
2  
3  
4  
5  
6 regression is not spurious. In the light of the above, we accept a short-run price elasticity of  
7  
8 demand at 0.441 and a short-run income elasticity of demand at 1.040.

9  
10  
11 Through the myopic addiction model, the additional variable ( $\ln Q_{t-1}$ ) shows no statistical  
12 significance. Therefore the model remains unchanged. Through the rational addiction  
13 model, only the variable representing following year's consumption ( $\ln Q_{t+1}$ ) is found  
14 significant (p value asymptotically equal to 0), with substantially lower levels of fit (R  
15 square). Thus, we conclude that addiction models fail to offer additional information on how  
16 consumption is influenced.

17  
18  
19  
20 Based on 2010 data, nominal tax revenue per pack is calculated at €2.78, a value verifying  
21 and corresponding to the fixed amount of tax (86% of the nominal retail price). We assume  
22 that the state maintains the existing ability to collect tribute. Government proclamations  
23 suggest that tobacco will be further taxed. Therefore, we distinct four scenarios, all with  
24 retail price increases, as anticipated, and each suggesting an additional price increase by  
25 €0.5. Calculations are made only for the following year and accordingly only short run  
26 elasticity is taken into account. Scenarios capture the impact of the continuing fall in income  
27 at a rate of 4.8%. Based on Ross et al methodology and data concerning tobacco-related  
28 mortality in Greece (Lower respiratory infections, Malignant neoplasms, Cardiovascular  
29 diseases and Respiratory diseases), we estimate reduction on smokers and mortality  
30 averted.[3,26]

31  
32  
33  
34  
35  
36  
37  
38  
39  
40  
41  
42 In all four scenarios, consumption is decreased substantially while tax revenue is still  
43 increased thanks to the inelastic demand. Moreover, smokers are significantly reduced and  
44 smoking related deaths are accordingly limited (Table 3).

Formatted: Font: Not Bold, No underline

Formatted: Font: Not Bold, No underline

Formatted: Line spacing: 1.5 lines

Formatted: Font: Not Bold, No underline,  
Subscript

Formatted: Font: Not Bold, No underline,  
Subscript

Formatted: Font: Not Bold, No underline



Table 32: Impact of price increase and income constraints on consumption, tax revenue, number of smokers and smoking related deaths

| Model scenarios                            | Scenario 1 | Scenario 2 | Scenario 3 | Scenario 4 |       |
|--------------------------------------------|------------|------------|------------|------------|-------|
| Price per pack                             | €4.47      | €4.97      | €5.47      | €5.97      |       |
| Percent increase of price                  | 12.59%     | 25.19%     | 37.78%     | 50.38%     |       |
| Fall in consumption due to price increase  | -5.55%     | -11.11%    | -16.66%    | -22.22%    |       |
| Fall in consumption due to income decrease | -4.99%     | -4.99%     | -4.99%     | -4.99%     |       |
| Per capita consumption level               | 1,779.84   | 1,669.33   | 1,558.82   | 1,448.31   |       |
| Per capita consumption deterred            | 209.83     | 320.34     | 430.85     | 541.36     |       |
| Tax revenue per pack                       | €3.84      | €4.27      | €4.70      | €5.13      |       |
| Tax revenue per cigarette                  | €0.192     | €0.214     | €0.235     | €0.257     |       |
| Total tax revenue (€ billion)              | €3,336     | €3,478     | €3,575     | €3,625     |       |
| Incremental tax revenue (€ billion)        | €0,455     | €0,597     | €0,694     | €0,744     |       |
| Reduction in number of smokers             | 205,650    | 313,956    | 422,262    | 530,568    |       |
| Smoking related deaths averted             | high(0,50) | 930        | 1,420      | 1,911      | 2,401 |
|                                            | low(0,25)  | 465        | 710        | 955        | 1,200 |

-Differences in calculations may occur due to rounding

-Impact of price increase shared between prevalence and consumption

-High estimate indicates that 50% of smokers' deaths are attributable to tobacco use, whereas low estimate indicates that 25% of smokers' deaths are attributable to tobacco use

~~In all four scenarios, consumption is decreased substantially while tax revenue is still increased thanks to the inelastic demand. Moreover, smokers are significantly reduced and smoking related deaths are accordingly limited.~~

## Discussion

Price elasticity estimates are greater than previous research in Greece,[8, 23-24] but consistent with findings by Gallet and List.[20] Estimates for income elasticity are far greater than estimates provided by literature in Greece.[8, 21-23] Regarding antismoking campaigns, results are in agreement with previous testimony.[23-24] Smoking restrictions show no statistical significance, confirming the claims by Joosens and Raw that compliance is low.[17] Finally, results are in general agreement with Alpert et al,[27] though a different methodology is followed.

Paired with the still high cigarette affordability, as documented in the current study and reported by previous research,[6] the nature of demand in Greece presents a vast opportunity for the policy makers to counter the tobacco epidemic and ensure revenue and cash flows at the same time. Even supposing that other determinants of demand, such as income, which is anticipated to fall, do not change, tobacco taxation proves to be a powerful tool. Annual consumption per person over 15 would be no higher than 1,780 cigarettes, even in the worst case (scenario1) and may fall to less than 1,448 cigarettes. On the other hand, tax revenue would recover from the downwards trend, accounting again for more than 1.80% of GDP, even in scenario1. In absolute values, excess tobacco tax revenue could rejuvenate the dismantled public coffers. Results suggest that even with a modest 10% of tax revenue allocated to offsetting the tobacco epidemic, there would be more than enough disposable funds towards planning, implementing, evaluating and improving antismoking efforts. Greeks seem to be in agreement with heavy taxation on cigarettes, but only if respective revenue is attributed to tobacco control.[28] In terms of public health benefits, smokers could be reduced by nearly 530,568 people, while up to 2,401 smoking related deaths could be averted on an annual basis. Nonetheless, findings should be treated with caution and increases in price should not be excessively increased from day one, as the

1  
2  
3  
4  
5  
6 smokers' reaction is not easy to predict with confidence intervals widened. A stepwise  
7  
8 increase of tax would eliminate many of the risks associated with a sharp and sudden  
9  
10 increase in cigarette prices. Besides, Greece already performs better in tax collection than  
11  
12 countries such as Germany, France and Slovenia among others,[26] as the excise per smoker  
13  
14 ratio indicates, with €738.71 collected for every smoker.

15  
16 Income sensitivity is larger than in any previous study either in Greece or internationally.  
17  
18 Thus, it is not exaggerating to argue that Greek smokers are shocked by the constraint on  
19  
20 their income. Besides, it is the first time in at least 40 years that income in Greece is falling at  
21  
22 this rate. The austerity measures should be viewed as a shift event in cigarette consumption,  
23  
24 among others.

25  
26 Reducing the toll of tobacco in Greece is not an easy task. Decisions should include fostering  
27  
28 an antismoking-culture through well-planned national antismoking campaigns, raising the  
29  
30 cigarettes prices at an initial level no less than €4 a pack and ensuring compliance with the  
31  
32 anti-smoking law, especially on the current occasion, when City Police (the main mechanism  
33  
34 of control on the matter) was recently abolished as an institution. Controlling illicit trade is  
35  
36 crucial to maximize the effect of interventions.

37  
38  
39 As regards to the limitations of this study, it must be noted that addictions models were  
40  
41 unable to provide statistically significant information, possibly due to the inclusion of 2012  
42  
43 data in the time series. Possible future analysis of an even wider time series could provide  
44  
45 even more reliable results, as multicollinearity could be fully cured. Furthermore, the study  
46  
47 could be strengthened by employing statistical tests on more observations, regarding the  
48  
49 endogeneity of cigarette prices. Moreover, the current study is based on the most popular  
50  
51 price category in order to estimate the impact of prices changes on cigarette demand. It is  
52  
53 possible that a weighted average for all the brands sold in Greece could eliminate  
54  
55 unilateralism on prices data. Still, the anticipated but not fully documented switch of Greek  
56  
57  
58  
59  
60

1  
2  
3  
4  
5  
6 smokers from manufactured cigarettes to hand-rolled tobacco should be taken into account  
7  
8 in any future research. Yet, if the increase of contraband cigarettes in the Greek market  
9  
10 could be quantified, results would be more punctual. In addition, tobacco shows synergistic  
11  
12 effect with other substances, such as alcohol. Thus, it would be meaningful to investigate  
13  
14 the combined effect of tobacco and alcohol from an economic aspect. Finally, researchers  
15  
16 argue that the increased availability of nicotine substitutes will reduce demand for tobacco  
17  
18 products and increase the price sensitivity as well.[19] Under that scope, if research included  
19  
20 nicotine substitutes, accuracy would be improved.  
21  
22  
23  
24  
25  
26  
27  
28  
29  
30  
31  
32  
33  
34  
35  
36  
37  
38  
39  
40  
41  
42  
43  
44  
45  
46  
47  
48  
49  
50  
51  
52  
53  
54  
55  
56  
57  
58  
59  
60

1  
2  
3  
4  
5  
6 **Contributorship Statement:** FT, [DZ](#) and AV performed the calculations and analyses  
7 reported in the text. FT and KA reviewed the literature for relevant data and documentation.  
8

9  
10 FT and KA drafted the manuscript which was edited and critically revised by KA, [AV](#) and IK.  
11

### 12 **Acknowledgements**

13  
14  
15 We would like to express our gratitude to Professor Frank Chaloupka for his valuable and  
16 constructive suggestions towards planning and development of this research work. His  
17 willingness to provide us his limited time has been very much appreciated.  
18  
19

20  
21  
22 **Funding:** ~~None.~~ [This research received no specific grant from any funding agency in the](#)  
23 [public, commercial or not-for-profit sectors.](#)  
24

25  
26 **Competing interests:** None.  
27

28  
29 **Data Sharing:** Extra data is available by emailing FT.  
30  
31  
32  
33  
34  
35  
36  
37  
38  
39  
40  
41  
42  
43  
44  
45  
46  
47  
48  
49  
50  
51  
52  
53  
54  
55  
56  
57  
58  
59  
60

## References

1. WHO. Global Health Risks: Mortality and burden of disease attributable to selected major risks. Geneva: World Health Organization 2009  
[http://www.who.int/healthinfo/global\\_burden\\_disease/GlobalHealthRisks\\_report\\_full.pdf](http://www.who.int/healthinfo/global_burden_disease/GlobalHealthRisks_report_full.pdf) (Accessed 14 Nov 2011).
2. Eriksen M, Mackay J, Ross H. The Tobacco Atlas. Fourth Ed. Atlanta, GA, American Cancer Society, New York: World Lung Foundation 2012.
3. WHO. WHO Global report: Mortality Attributable to Tobacco. Geneva: World Health Organization 2012  
[http://whqlibdoc.who.int/publications/2012/9789241564434\\_eng.pdf](http://whqlibdoc.who.int/publications/2012/9789241564434_eng.pdf) (Accessed 5 Oct 2012).
4. Filippidis FT, Vardavas CI, Loukopoulou A et al. Prevalence and determinants of tobacco use among adults in Greece: 4 year trends. Eur J Public Health 2013;23(5):772-776.
5. Vardavas CI, Kondilis B, Travers MJ et al. Environmental tobacco smoke in hospitality venues in Greece. BMC Public Health 2007;7(1):302.
6. Blecher EH, Van Walbeek CP. Cigarette affordability trends: an update and some methodological comments. Tobacco Control 2009;18(3):167-175.
7. Vardavas CI, Kafatos AG. Smoking policy and prevalence in Greece: an overview. The European Journal of Public Health 2007;17(2):211-213.
8. Hondroyiannis G, Papapetrou E. Cigarette consumption in Greece: empirical evidence from cointegration analysis. Applied Economics Letters 1997;4:571-574
9. Ministry of Health and Social Solidarity. The Greek National Plan of Action against Cancer 2008-2012, Athens, 2008. [http://ygeiamap.gov.gr/wp-content/uploads/2013/05/karkinos\\_teliko.pdf](http://ygeiamap.gov.gr/wp-content/uploads/2013/05/karkinos_teliko.pdf) (Accessed 5 Oct 2011)
10. Hellenic Statistical Authority, Workforce research, Press release 19 September 2013,

Field Code Changed

Field Code Changed

Field Code Changed

- 1  
2  
3  
4  
5  
6 <http://www.statistics.gr/portal/page/portal/ESYE/BUCKET/A0101/PressReleases/A0>  
7  
8 [101\\_SJO01\\_DT\\_QQ\\_02\\_2013\\_01\\_F\\_GR.pdf](http://www.statistics.gr/portal/page/portal/ESYE/BUCKET/A0101/PressReleases/A0101_SJO01_DT_QQ_02_2013_01_F_GR.pdf) (Accessed 7 November 2013)  
9
- 10 11. Eurostat news release 26 February 2013, Eurostat press office  
11  
12 [http://europa.eu/rapid/press-release\\_STAT-13-28\\_en.htm](http://europa.eu/rapid/press-release_STAT-13-28_en.htm) (Accessed 27 February  
13 2013)  
14
- 15 12. Wilkins N, Yurekli A, Hu TW. Economic analysis of tobacco demand. Economics of  
16 Tobacco Toolkit. Washington: World Bank 2004  
17  
18 <http://siteresources.worldbank.org/INTPH/Resources/3Demand.pdf> (Accessed 24  
19 Nov 2011)  
20
- 21 13. Godfrey C, Maynard A. Economic aspects of tobacco use and taxation policy. BMJ  
22 1998;297(6644):339–343.  
23
- 24 14. Kahende JW, Loomis BR, Adhikari B, Marshall L. A review of economic evaluations of  
25 tobacco control programs. Int J Environ Res Public Health 2009;6(1):51-68.  
26
- 27 15. Farrelly M, Bray J. Responses to cigarette tax increases by race/ethnicity, income  
28 and age groups – United States, 1976–1993. Journal of the American Medical  
29 Association 1999;280:1979-1980.  
30
- 31 16. Chaloupka F, Warner E. The economics of smoking. Handbook of Health Economics,  
32 2000;1:1539-1627.  
33
- 34 17. Joossens L, Raw M. The tobacco control scale 2010 in Europe. Brussels: Association  
35 of European Cancer Leagues 2011.  
36
- 37 18. WHO. Report on the Global Tobacco Epidemic, 2008: The MPOWER package.  
38 Geneva: World Health Organization 2008  
39  
40 [http://www.who.int/tobacco/mpower/mpower\\_report\\_full\\_2008.pdf](http://www.who.int/tobacco/mpower/mpower_report_full_2008.pdf) (Accessed 14  
41 Nov 2011).  
42  
43  
44  
45  
46  
47  
48  
49  
50  
51  
52  
53  
54  
55  
56  
57  
58  
59  
60

Field Code Changed

Field Code Changed

Field Code Changed

Field Code Changed

19. Chaloupka F, Pacula R. The impact of price on youth tobacco use. *Changing Adolescent Smoking Prevalence: Where It Is and Why*, Smoking and Tobacco Control Monograph 1999:14.
20. Gallet C, List J. Cigarette demand: A meta-analysis of elasticities. *Health Econ* 2003;12:821-835.
21. Stavrinou VG. The effects of an anti-smoking campaign on cigarette consumption: empirical evidence from Greece. *Applied Economics* 1987;19:323-329.
22. Raptou E, Mattas K, Tsakiridou E et al. Factors affecting cigarette demand. *International Advances in Economic Research* 2005;11(3):275-290.
23. Nikolaou A, Velentzas K. Estimating the Demand for Cigarettes in Greece: An Error Correction Model, *Agricultural Economics Review* 2001;2(1):20-27.
24. Dritsakis E. Forecasting of cigarettes consumption in Greece: An empirical investigation with cointegration analysis. *Agricultural Economic Review* 2003;4(2):47-56.
25. Wasserman J, Manning WG, Newhouse JP et al. The Effects of Excise Taxes and Regulations on Cigarette Smoking. *Journal of Health Economics* 1991;10(1):43-64.
26. Ross HZ, Shariff S, Gilmore A. *Economics of Tobacco Taxation in Russia*. Paris: International Union Against Tuberculosis and Lung Disease 2008.
27. Alpert HR, Vardavas CI, Chaloupka FJ et al. The recent and projected public health and economic benefits of cigarette taxation in Greece. *Tobacco Control* 2013 Mar 6. [Epub ahead of print]
28. Vardavas CI, Filippidis FT, Agaku I et al. Tobacco taxation: the importance of earmarking the revenue to health care and tobacco control. *Tobacco induced diseases* 2012;10(1):21.



1  
2  
3  
4  
5  
6  
7  
8  
9  
10  
11  
12  
13  
14  
15  
16  
17  
18  
19  
20  
21  
22  
23  
24  
25  
26  
27  
28  
29  
30  
31  
32  
33  
34  
35  
36  
37  
38  
39  
40  
41  
42  
43  
44  
45  
46  
47  
48  
49  
50  
51  
52  
53  
54  
55  
56  
57  
58  
59  
60

**Figures**

Figure 1: The demand curve before government intervention

Figure 2: The demand curve after government intervention

For peer review only

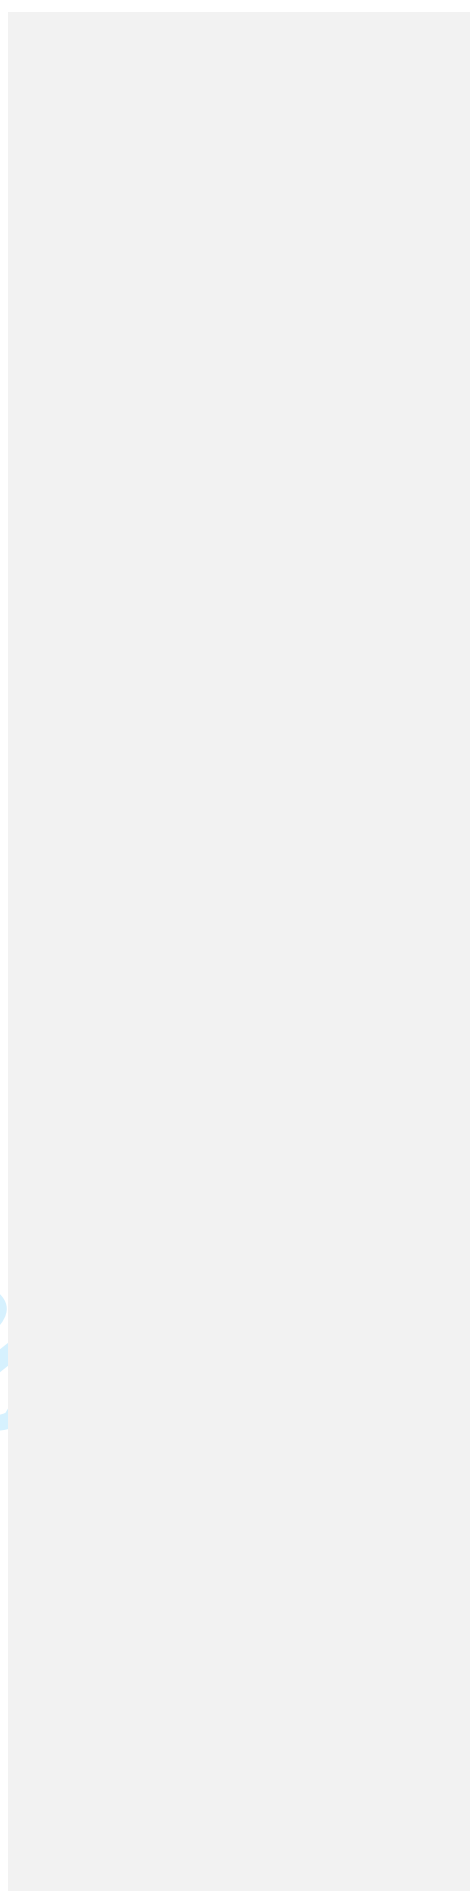

Supplement: bmjopen-2013-004748.draft_revisions.pdf [file bmjopen-2013-004748.draft_revisions.pdf]
